# Supplementary material
Source: PubMed Central journal article supplement (PMC7340531)
Supplement: NIHMS1589953-supplement-22.pdf [file NIHMS1589953-supplement-22.pdf]

**Extended Data Table 1**

| C1a          | C1a          |
|--------------|--------------|
| 1            | 1            |
| 1389043_at   | 1383935_at   |
| 1369772_at   | 1369550_at   |
| 1382074_at   | 1377768_at   |
| 1367499_at   | 1388170_at   |
| 1378552_at   | 1383354_a_at |
| 1389675_at   | 1391582_at   |
| 1374806_at   | 1376628_at   |
| 1367715_at   | 1369391_at   |
| 1392107_at   | 1374911_at   |
| 1369814_at   | 1373730_at   |
| 1370928_at   | 1390391_at   |
| 1374228_at   | 1386611_at   |
| 1397916_s_at | 1384063_at   |
| 1376737_at   | 1377221_at   |
| 1371529_at   | 1376204_at   |
| 1384389_at   | 1376125_at   |
| 1371697_at   | 1398455_at   |
| 1385627_at   | 1389569_at   |
| 1369778_at   | 1377688_at   |
| 1373219_at   | 1387453_at   |
| 1368370_at   | 1384381_at   |
| 1380414_at   | 1369738_s_at |
| 1390571_at   | 1382404_at   |
| 1371781_at   | 1374422_at   |
| 1390519_at   | 1368947_at   |
| 1388812_at   | 1386181_at   |
| 1371550_at   | 1368856_at   |
| 1387153_at   | 1368527_at   |
| 1369352_at   | 1370141_at   |
| 1367825_at   | 1373035_at   |
| 1390535_at   | 1371079_at   |
| 1387132_at   | 1384507_at   |
| 1378005_at   | 1373062_at   |
| 1371019_at   | 1397848_at   |
| 1391543_at   | 1374113_at   |
| 1375866_at   | 1388672_at   |
| 1369012_at   | 1371988_at   |
| 1378126_at   | 1387995_a_at |
| 1391095_at   | 1388482_at   |
| 1392267_at   | 1371974_at   |
| 1374626_at   | 1377761_at   |
| 1372579_at   | 1387959_at   |
| 1368489_at   | 1388054_a_at |

| C2b          | C2b        | C2b          |
|--------------|------------|--------------|
| 2            | 2          | 2            |
| 1395359_at   | 1377821_at | 1373544_at   |
| 1377617_at   | 1391848_at | 1386947_at   |
| 1385422_at   | 1390569_at | 1392929_at   |
| 1379338_at   | 1389306_at | 1381449_s_at |
| 1393813_at   | 1374535_at | 1382454_at   |
| 1368939_a_at | 1384792_at | 1368146_at   |
| 1396803_at   | 1370950_at | 1387450_at   |
| 1380144_at   | 1390136_at | 1386811_at   |
| 1393596_at   | 1383240_at | 1376569_at   |
| 1382312_at   | 1393368_at | 1389974_at   |
| 1391689_at   | 1391139_at | 1376463_at   |
| 1383334_at   | 1368993_at | 1395744_at   |
| 1390486_at   | 1393576_at | 1394891_at   |
| 1394972_at   | 1390423_at | 1379763_at   |
| 1392738_at   | 1370831_at | 1377629_at   |
| 1380475_at   | 1392799_at | 1386064_at   |
| 1377906_at   | 1372480_at | 1386707_at   |
| 1395100_at   | 1379755_at | 1379058_at   |
| 1390706_at   | 1383827_at | 1381175_at   |
| 1395923_at   | 1385243_at | 1382413_at   |
| 1396207_at   | 1386979_at | 1390723_at   |
| 1383786_at   | 1390480_at | 1392555_at   |
| 1379615_at   | 1388742_at | 1389996_at   |
| 1397335_at   | 1370907_at | 1398445_at   |
| 1381394_at   | 1371430_at | 1377781_at   |
| 1383849_at   | 1373521_at | 1384513_at   |
| 1376865_at   | 1370302_at | 1376129_at   |
| 1394079_at   | 1387112_at | 1390351_at   |
| 1385393_at   | 1374216_at | 1377651_at   |
| 1370932_at   | 1375726_at | 1375538_at   |
| 1395154_at   | 1389711_at | 1379506_at   |
| 1381115_at   | 1376700_at | 1394834_at   |
| 1394243_at   | 1379444_at | 1381817_at   |
| 1388000_at   | 1398362_at | 1391552_at   |
| 1383066_at   | 1375640_at | 1380685_at   |
| 1391305_at   | 1395201_at | 1385889_at   |
| 1395714_at   | 1374448_at | 1390942_at   |
| 1368858_at   | 1368514_at | 1390077_at   |
| 1376194_at   | 1395794_at | 1394727_at   |
| 1383811_at   | 1373676_at | 1379511_at   |
| 1385431_at   | 1398387_at | 1398528_at   |
| 1368825_at   | 1371518_at | 1381402_at   |
| 1370114_a_at | 1398354_at | 1392182_at   |

|              |              |
|--------------|--------------|
| 1367721_at   | 1371040_at   |
| 1371237_a_at | 1389295_at   |
| 1388271_at   | 1373310_at   |
| 1383860_at   | 1376102_at   |
| 1387558_at   | 1388149_at   |
| 1369885_at   | 1382919_at   |
| 1373225_at   | 1396163_at   |
| 1370023_at   | 1376481_at   |
| 1374468_at   | 1394160_at   |
| 1377210_at   | 1392881_at   |
| 1373984_at   | 1387759_s_at |
| 1368353_at   | 1370177_at   |
| 1372691_at   | 1395765_at   |
| 1367712_at   | 1392946_at   |
| 1385869_at   | 1371450_at   |
| 1369191_at   | 1370452_at   |
| 1393456_at   | 1385827_at   |
| 1388944_at   | 1388485_at   |
| 1393730_at   | 1383655_at   |
| 1384294_at   | 1368015_at   |
| 1388722_at   | 1393477_at   |
| 1388924_at   | 1383949_at   |
| 1373224_at   | 1368254_a_at |
| 1378800_at   | 1389380_at   |
| 1376151_a_at | 1376648_at   |
| 1392818_at   | 1369619_at   |
| 1371785_at   | 1368892_at   |
| 1384260_at   | 1376976_at   |
| 1367973_at   | 1385450_at   |
| 1377340_at   | 1373403_at   |
| 1393550_at   | 1394047_at   |
| 1378925_at   | 1393516_at   |
| 1379935_at   | 1380318_at   |
| 1372520_at   | 1369973_at   |
| 1372729_at   | 1370445_at   |
| 1380229_at   | 1370595_a_at |
| 1397437_at   | 1370606_at   |
| 1377103_at   | 1379312_at   |
| 1391643_at   | 1391808_at   |
| 1379311_at   | 1368931_at   |
| 1380772_at   | 1379500_at   |
| 1372211_at   | 1387952_a_at |
| 1371194_at   | 1393105_at   |
| 1388587_at   | 1383551_at   |
| 1387343_at   | 1370624_at   |

|              |              |            |
|--------------|--------------|------------|
| 1375542_at   | 1392935_at   | 1380777_at |
| 1384648_at   | 1372101_at   | 1378745_at |
| 1384812_at   | 1373151_at   | 1376531_at |
| 1374780_at   | 1389003_at   | 1390743_at |
| 1391598_at   | 1388592_at   | 1396894_at |
| 1382812_at   | 1391556_at   | 1395521_at |
| 1382171_at   | 1390411_at   | 1382020_at |
| 1379412_at   | 1387040_at   | 1394330_at |
| 1398217_at   | 1398258_at   | 1380825_at |
| 1378003_at   | 1389157_at   | 1378548_at |
| 1370260_at   | 1373122_at   | 1378628_at |
| 1379578_at   | 1373130_at   | 1398130_at |
| 1373566_at   | 1382108_at   | 1385156_at |
| 1384182_at   | 1392597_at   | 1384692_at |
| 1376967_at   | 1382732_at   | 1376388_at |
| 1371003_at   | 1387313_at   | 1380701_at |
| 1381021_at   | 1370956_at   | 1393995_at |
| 1380172_at   | 1370895_at   | 1390302_at |
| 1394347_at   | 1375266_at   | 1392311_at |
| 1375523_at   | 1368202_a_at | 1395436_at |
| 1369742_at   | 1391448_at   | 1397120_at |
| 1382064_at   | 1388557_at   | 1395130_at |
| 1380371_at   | 1368671_at   | 1396773_at |
| 1394746_at   | 1380133_at   | 1378486_at |
| 1376725_at   | 1371847_at   | 1379722_at |
| 1390813_at   | 1373538_at   | 1392650_at |
| 1383053_x_at | 1391012_at   | 1377305_at |
| 1383455_at   | 1375709_at   | 1382951_at |
| 1370935_at   | 1389553_at   | 1377212_at |
| 1392249_at   | 1384707_at   | 1397608_at |
| 1391170_at   | 1371394_x_at | 1378682_at |
| 1374803_at   | 1385527_at   | 1382911_at |
| 1381958_at   | 1367971_at   | 1397422_at |
| 1384133_at   | 1390738_at   | 1396877_at |
| 1390983_at   | 1367517_at   | 1396957_at |
| 1388167_at   | 1393808_at   | 1394837_at |
| 1370432_at   | 1382691_at   | 1384890_at |
| 1387146_a_at | 1372110_at   | 1396450_at |
| 1368080_at   | 1386943_at   | 1391523_at |
| 1389214_at   | 1368090_at   | 1394416_at |
| 1377923_at   | 1371310_s_at | 1375468_at |
| 1367860_a_at | 1373911_at   | 1382847_at |
| 1373432_at   | 1370155_at   | 1368242_at |
| 1394574_at   | 1388422_at   | 1377151_at |
| 1388101_at   | 1368861_a_at | 1396952_at |

|              |              |
|--------------|--------------|
| 1382351_at   | 1373590_at   |
| 1391042_at   | 1381923_at   |
| 1382379_at   | 1369766_at   |
| 1396217_at   | 1390943_at   |
| 1382059_at   | 1387389_at   |
| 1377187_at   | 1368921_a_at |
| 1384147_at   | 1393825_at   |
| 1387606_at   | 1370773_a_at |
| 1385180_at   | 1369845_at   |
| 1376645_at   | 1370406_a_at |
| 1377387_a_at | 1385857_at   |
| 1377019_at   | 1395789_at   |
| 1368473_at   | 1398273_at   |
| 1393553_at   | 1370781_a_at |
| 1375041_at   | 1395620_at   |
| 1374137_at   | 1395840_at   |
| 1369035_a_at | 1368864_at   |
| 1376425_at   | 1382199_at   |
| 1377380_at   | 1386106_at   |
| 1383661_at   | 1381611_at   |
| 1377310_at   | 1371166_at   |
| 1392640_at   | 1383489_at   |
| 1388666_at   | 1370047_at   |
| 1375901_at   | 1386870_at   |
| 1384993_at   | 1386660_at   |
| 1394953_at   | 1393331_at   |
| 1382275_at   | 1382533_at   |
| 1388528_at   | 1368924_at   |
| 1368585_at   | 1368853_at   |
| 1374857_at   | 1387824_at   |
| 1367938_at   | 1369781_at   |
| 1375714_at   | 1393480_at   |
| 1380972_at   | 1383180_at   |
| 1371792_at   | 1385217_at   |
| 1382527_at   | 1368980_at   |
| 1369055_at   | 1384950_at   |
| 1371824_at   | 1378261_at   |
| 1387319_at   | 1368941_at   |
| 1388858_at   | 1395696_at   |
| 1374570_at   | 1369421_at   |
| 1383993_at   | 1369069_at   |
| 1373499_at   | 1388233_at   |
| 1382950_at   | 1370650_s_at |
| 1372750_at   | 1369496_at   |
| 1373421_at   | 1388686_at   |

|              |              |              |
|--------------|--------------|--------------|
| 1372668_at   | 1372643_at   | 1376742_at   |
| 1392166_at   | 1379345_at   | 1391863_at   |
| 1395535_at   | 1369955_at   | 1390733_at   |
| 1386089_at   | 1370951_at   | 1371776_at   |
| 1370948_a_at | 1368989_at   | 1390100_s_at |
| 1393702_at   | 1395590_at   | 1396502_at   |
| 1379485_at   | 1368388_at   | 1380738_at   |
| 1382620_at   | 1372926_at   | 1377589_at   |
| 1384573_at   | 1393933_at   | 1396066_at   |
| 1376299_at   | 1395157_at   | 1380882_at   |
| 1387964_a_at | 1385191_at   | 1392055_at   |
| 1378775_at   | 1385493_at   | 1393548_at   |
| 1367728_at   | 1379822_at   | 1378161_at   |
| 1375396_at   | 1392178_at   | 1371771_at   |
| 1369628_at   | 1371186_at   | 1383214_at   |
| 1380062_at   | 1393558_at   | 1379089_at   |
| 1379555_at   | 1385825_at   | 1390345_at   |
| 1382118_at   | 1370693_a_at | 1398020_at   |
| 1382265_at   | 1379516_at   | 1382068_at   |
| 1392840_at   | 1370032_at   | 1393594_at   |
| 1397700_x_at | 1386041_a_at | 1395030_at   |
| 1398716_at   | 1395721_at   | 1397453_at   |
| 1396141_at   | 1388034_at   | 1375782_at   |
| 1379715_at   | 1387367_at   | 1393674_at   |
| 1369044_a_at | 1397983_at   | 1395264_at   |
| 1391758_at   | 1371069_at   | 1381121_at   |
| 1368411_a_at | 1387760_a_at | 1397690_at   |
| 1380730_at   | 1384386_at   | 1373972_at   |
| 1369678_a_at | 1382561_at   | 1389104_s_at |
| 1391838_at   | 1396255_at   | 1394467_at   |
| 1397201_at   | 1395251_at   | 1380693_at   |
| 1384355_at   | 1396154_at   | 1397999_at   |
| 1380063_at   | 1380363_at   | 1378062_at   |
| 1397241_at   | 1384639_at   | 1391304_at   |
| 1395358_at   | 1393606_at   | 1375577_at   |
| 1382565_at   | 1371173_a_at | 1395365_at   |
| 1394699_at   | 1373358_at   | 1397786_at   |
| 1396676_at   | 1369172_at   | 1395205_at   |
| 1384728_at   | 1397525_at   | 1376938_at   |
| 1387406_at   | 1397164_at   | 1378814_at   |
| 1397505_at   | 1377445_at   | 1398225_at   |
| 1393866_at   | 1369248_a_at | 1396775_at   |
| 1397573_at   | 1385364_at   | 1396135_at   |
| 1392269_at   | 1375721_at   | 1381253_at   |
| 1382286_at   | 1393198_at   | 1368841_at   |

|              |              |
|--------------|--------------|
| 1368420_at   | 1376867_at   |
| 1387868_at   | 1367795_at   |
| 1387037_at   | 1378074_at   |
| 1367940_at   | 1397527_at   |
| 1390969_at   | 1385753_at   |
| 1387202_at   | 1387585_at   |
| 1389754_at   | 1390801_at   |
| 1369737_at   | 1380054_at   |
| 1379910_at   | 1369222_at   |
| 1398482_at   | 1390262_a_at |
| 1371644_at   | 1380611_at   |
| 1370257_at   | 1369577_at   |
| 1393728_at   | 1385808_at   |
| 1376100_at   | 1368758_a_at |
| 1367741_at   | 1368962_at   |
| 1383486_at   | 1370757_at   |
| 1370080_at   | 1369428_a_at |
| 1374474_at   |              |
| 1378420_at   |              |
| 1382154_at   |              |
| 1368266_at   |              |
| 1387090_a_at |              |
| 1372599_at   |              |
| 1372752_at   |              |
| 1374758_at   |              |
| 1392502_at   |              |
| 1389742_at   |              |
| 1385568_at   |              |
| 1387769_a_at |              |
| 1371713_at   |              |
| 1368645_at   |              |
| 1386888_at   |              |
| 1378196_at   |              |
| 1382315_at   |              |
| 1369871_at   |              |
| 1370051_at   |              |
| 1368487_at   |              |
| 1373623_at   |              |
| 1376775_at   |              |
| 1376144_at   |              |
| 1380110_at   |              |
| 1368224_at   |              |
| 1372236_at   |              |
| 1377049_at   |              |
| 1381775_at   |              |

|              |            |              |
|--------------|------------|--------------|
| 1380195_at   | 1379397_at | 1395460_at   |
| 1389894_at   | 1395799_at | 1392026_at   |
| 1389986_at   | 1369323_at | 1376667_at   |
| 1395092_at   | 1382478_at | 1376917_at   |
| 1381967_at   | 1378666_at | 1394778_at   |
| 1369159_at   | 1393910_at | 1387350_at   |
| 1390277_at   | 1387563_at | 1389908_at   |
| 1392730_at   | 1387998_at | 1380541_at   |
| 1390340_a_at | 1368589_at | 1376138_at   |
| 1375739_at   | 1382524_at | 1376096_a_at |
| 1391285_at   | 1374283_at | 1376750_at   |
| 1380696_at   | 1378544_at | 1382229_at   |
| 1397666_at   | 1388157_at | 1379779_at   |
| 1369810_at   | 1375444_at | 1381489_at   |
| 1390655_at   | 1373759_at | 1385453_at   |
| 1398125_at   | 1387260_at | 1381985_at   |
| 1382920_at   | 1397884_at | 1372911_at   |
| 1394392_at   | 1386935_at | 1375767_at   |
| 1381644_at   | 1368453_at | 1391209_at   |
| 1391906_at   | 1379803_at | 1379936_at   |
| 1382658_at   | 1371104_at | 1384969_at   |
| 1393418_at   | 1387793_at | 1380168_at   |
| 1370955_at   | 1375214_at | 1368320_at   |
| 1397851_at   | 1375531_at | 1383982_at   |
| 1392566_at   | 1393433_at | 1394714_at   |
| 1376770_at   | 1393860_at | 1391701_at   |
| 1376733_at   | 1385641_at | 1397673_at   |
| 1394985_at   | 1398591_at | 1375449_at   |
| 1396612_at   | 1398256_at | 1384380_at   |
| 1385087_at   | 1368290_at | 1382749_at   |
| 1376208_at   | 1375043_at | 1391160_at   |
| 1369093_at   | 1372389_at | 1388604_at   |
| 1395105_at   | 1386995_at | 1377045_at   |
| 1371361_at   | 1368321_at | 1393662_at   |
| 1368087_a_at | 1373401_at | 1384146_at   |
| 1370946_at   | 1387060_at | 1392704_at   |
| 1377753_at   | 1374974_at | 1393692_at   |
| 1376313_at   | 1385202_at | 1380097_at   |
| 1383013_at   | 1374546_at | 1368887_at   |
| 1389441_at   | 1389562_at | 1379753_at   |
| 1390728_at   | 1374171_at | 1398131_at   |
| 1367968_at   | 1373658_at | 1380154_at   |
| 1375857_at   | 1375030_at | 1381668_at   |
| 1385779_at   | 1385367_at | 1379815_at   |
| 1383222_at   | 1372479_at | 1370991_at   |

|              |  |
|--------------|--|
| 1376891_at   |  |
| 1373975_at   |  |
| 1387050_s_at |  |
| 1373286_at   |  |
| 1391026_at   |  |
| 1386552_at   |  |
| 1398706_at   |  |
| 1383574_at   |  |
| 1373989_at   |  |
| 1397304_at   |  |
| 1384968_at   |  |
| 1368332_at   |  |
| 1368014_at   |  |
| 1368361_a_at |  |
| 1374473_at   |  |
| 1378440_at   |  |
| 1393563_at   |  |
| 1393316_at   |  |
| 1372414_at   |  |
| 1373554_at   |  |
| 1387610_at   |  |

|              |            |            |
|--------------|------------|------------|
| 1374241_at   | 1387094_at | 1391975_at |
| 1374708_at   | 1390159_at | 1386102_at |
| 1374144_at   | 1390300_at | 1378099_at |
| 1376170_at   | 1379568_at | 1395249_at |
| 1385887_at   | 1392157_at | 1393879_at |
| 1387854_at   | 1368542_at | 1381125_at |
| 1367563_at   | 1382914_at | 1391841_at |
| 1389546_at   | 1389763_at | 1397692_at |
| 1373648_at   | 1391167_at | 1381646_at |
| 1390404_at   | 1372069_at | 1395772_at |
| 1372758_at   | 1392785_at | 1397153_at |
| 1375138_at   | 1387454_at | 1396254_at |
| 1387024_at   | 1384841_at | 1374786_at |
| 1393663_at   | 1392587_at | 1378367_at |
| 1387767_a_at | 1386026_at | 1377919_at |
| 1372440_at   | 1382134_at | 1381472_at |
| 1390429_at   | 1382535_at | 1396791_at |
| 1388392_at   | 1368728_at | 1385164_at |
| 1388618_at   | 1382599_at | 1381133_at |
| 1387897_at   | 1384617_at | 1383479_at |
| 1375862_at   | 1389235_at | 1394848_at |

|            |
|------------|
| C2b        |
| 2          |
| 1376524_at |
| 1393029_at |
| 1385091_at |
| 1397004_at |
| 1379594_at |
| 1375689_at |
| 1392846_at |
| 1396252_at |
| 1396850_at |
| 1385177_at |
| 1378604_at |
| 1373534_at |
| 1378038_at |
| 1395728_at |
| 1394283_at |
| 1397217_at |
| 1381210_at |
| 1379150_at |
| 1377377_at |
| 1380087_at |
| 1374263_at |
| 1392368_at |
| 1395335_at |
| 1390320_at |
| 1396965_at |
| 1397624_at |
| 1382982_at |
| 1392017_at |
| 1390671_at |
| 1391579_at |
| 1375217_at |
| 1377208_at |
| 1391196_at |
| 1394729_at |
| 1380940_at |
|            |
|            |
|            |
|            |
|            |
|            |
|            |
|            |
|            |
|            |

|              |              |              |              |
|--------------|--------------|--------------|--------------|
| C2a          | C2a          | C2a          | C2a          |
| 3            | 3            | 3            | 3            |
| 1396348_at   | 1383439_at   | 1377840_at   | 1385047_x_at |
| 1385668_at   | 1371530_at   | 1371352_at   | 1393109_at   |
| 1389172_at   | 1394678_at   | 1380175_at   | 1376047_at   |
| 1379971_at   | 1383920_at   | 1376063_at   | 1373829_at   |
| 1397317_at   | 1384081_at   | 1368295_at   | 1388784_at   |
| 1384996_at   | 1395126_at   | 1379677_at   | 1382692_at   |
| 1381732_at   | 1374403_at   | 1380405_at   | 1376457_at   |
| 1374043_at   | 1383058_at   | 1387164_at   | 1388730_at   |
| 1380941_at   | 1380387_at   | 1375660_at   | 1370449_at   |
| 1386059_at   | 1388569_at   | 1374257_at   | 1370301_at   |
| 1367902_at   | 1376344_at   | 1373642_at   | 1391812_at   |
| 1389734_x_at | 1389617_at   | 1370334_at   | 1387022_at   |
| 1389413_at   | 1384310_at   | 1377943_at   | 1370864_at   |
| 1391637_at   | 1379200_at   | 1388511_at   | 1387922_at   |
| 1382173_at   | 1394033_at   | 1389475_at   | 1386912_at   |
| 1373740_at   | 1393691_at   | 1370959_at   | 1389403_at   |
| 1398732_at   | 1390881_at   | 1371924_at   | 1391341_at   |
| 1397610_at   | 1371015_at   | 1386899_at   | 1378720_at   |
| 1373748_at   | 1388298_at   | 1392672_at   | 1390348_at   |
| 1385275_at   | 1388211_s_at | 1394451_at   | 1385978_at   |
| 1379766_at   | 1368930_at   | 1373240_at   | 1392265_s_at |
| 1383020_at   | 1391383_at   | 1372070_at   | 1374247_at   |
| 1389034_at   | 1368381_at   | 1387886_at   | 1382184_at   |
| 1379253_at   | 1396316_at   | 1395003_at   | 1384298_at   |
| 1395439_at   | 1370024_at   | 1368555_at   | 1393038_at   |
| 1380050_at   | 1379374_at   | 1380088_at   | 1369725_at   |
| 1374572_at   | 1390964_at   | 1380616_at   | 1373785_at   |
| 1377169_at   | 1374475_at   | 1384127_at   | 1392813_at   |
| 1386881_at   | 1396001_at   | 1373881_at   | 1383658_at   |
| 1392234_at   | 1378324_at   | 1375247_at   | 1390849_at   |
| 1380267_at   | 1370823_at   | 1387789_at   | 1384195_at   |
| 1395204_at   | 1389622_at   | 1368563_at   | 1392965_a_at |
| 1388725_at   | 1371052_at   | 1393259_at   | 1374730_at   |
| 1393641_at   | 1368587_at   | 1389490_at   | 1385682_at   |
| 1392722_at   | 1370414_at   | 1389059_at   | 1391630_at   |
| 1389697_at   | 1370531_a_at | 1387323_at   | 1390510_at   |
| 1383008_at   | 1397511_at   | 1368047_at   | 1371913_at   |
| 1393552_x_at | 1385051_at   | 1371595_at   | 1381145_at   |
| 1381902_at   | 1398250_at   | 1387655_at   | 1368395_at   |
| 1387571_at   | 1392118_at   | 1382278_at   |              |
| 1382296_at   | 1385692_at   | 1381498_at   |              |
| 1376036_at   | 1388385_at   | 1392741_at   |              |
| 1385252_at   | 1367887_at   | 1396152_s_at |              |









|  |
|--|
|  |
|  |
|  |
|  |
|  |
|  |
|  |
|  |
|  |
|  |
|  |
|  |
|  |
|  |
|  |
|  |
|  |
|  |
|  |
|  |
|  |
|  |
|  |
|  |
|  |
|  |
|  |
|  |

|              |              |              |  |
|--------------|--------------|--------------|--|
| 1367659_s_at | 1378164_at   | 1392074_at   |  |
| 1384535_at   | 1376878_at   | 1382531_at   |  |
| 1377632_at   | 1375658_at   | 1379295_at   |  |
| 1372125_at   | 1380228_at   | 1390798_at   |  |
| 1396383_at   | 1375231_a_at | 1367912_at   |  |
| 1395472_at   | 1392595_at   | 1397736_at   |  |
| 1395644_at   | 1378048_at   | 1385572_at   |  |
| 1373659_at   | 1387111_at   | 1383708_at   |  |
| 1368919_at   | 1369751_at   | 1389783_s_at |  |
| 1393876_at   | 1385876_at   | 1393688_at   |  |
| 1389612_at   | 1389324_at   | 1372200_at   |  |
| 1383414_at   | 1371045_at   | 1398246_s_at |  |
| 1378397_at   | 1368339_at   | 1370202_at   |  |
| 1392928_at   | 1376998_a_at | 1367791_at   |  |
| 1380822_at   | 1376240_at   | 1391977_at   |  |
| 1390037_at   | 1374200_at   | 1372029_at   |  |
| 1384699_at   | 1378802_at   | 1368027_at   |  |
| 1380810_at   | 1370106_at   | 1380894_at   |  |
| 1381208_at   | 1391618_at   | 1367749_at   |  |
| 1392170_at   | 1373161_at   | 1373932_at   |  |
| 1373484_at   | 1393974_at   | 1379344_at   |  |

| C2c          | C2c        | C2c          |
|--------------|------------|--------------|
| 4            | 4          | 4            |
| 1370949_at   | 1387349_at | 1377111_at   |
| 1384394_at   | 1377857_at | 1379140_at   |
| 1382307_at   | 1382301_at | 1375119_at   |
| 1391625_at   | 1385972_at | 1369735_at   |
| 1379571_at   | 1396696_at | 1397632_at   |
| 1393836_at   | 1383343_at | 1380503_at   |
| 1397362_at   | 1383795_at | 1379804_at   |
| 1383825_at   | 1380783_at | 1397552_at   |
| 1371093_at   | 1397373_at | 1375453_at   |
| 1390398_at   | 1368255_at | 1379461_at   |
| 1379101_at   | 1381063_at | 1391600_at   |
| 1373347_at   | 1369681_at | 1375378_at   |
| 1368725_at   | 1395395_at | 1395711_at   |
| 1381850_at   | 1391549_at | 1396470_at   |
| 1375459_at   | 1385773_at | 1379103_at   |
| 1391430_at   | 1385974_at | 1368871_at   |
| 1378965_at   | 1390797_at | 1375212_at   |
| 1393795_at   | 1376836_at | 1376533_at   |
| 1384376_at   | 1370090_at | 1370063_at   |
| 1377457_a_at | 1383064_at | 1370512_at   |
| 1390710_x_at | 1391711_at | 1392441_at   |
| 1383054_at   | 1394401_at | 1372812_at   |
| 1368401_at   | 1392040_at | 1389836_a_at |
| 1369679_a_at | 1395076_at | 1371202_a_at |
| 1375174_at   | 1390777_at | 1378325_at   |
| 1391719_at   | 1393901_at | 1398544_at   |
| 1379664_at   | 1370043_at | 1370052_at   |
| 1393564_at   | 1385215_at | 1389957_at   |
| 1391416_at   | 1384181_at | 1379398_at   |
| 1397535_at   | 1378509_at | 1391576_at   |
| 1387199_a_at | 1391935_at | 1390923_a_at |
| 1383063_a_at | 1379062_at | 1382226_at   |
| 1370607_a_at | 1382705_at | 1375699_at   |
| 1374463_at   | 1380523_at | 1375259_at   |
| 1383044_at   | 1378962_at | 1392666_at   |
| 1382775_at   | 1380325_at | 1380143_at   |
| 1380069_at   | 1384311_at | 1382654_at   |
| 1376562_at   | 1377172_at | 1377881_at   |
| 1394961_at   | 1392144_at | 1382953_at   |
| 1372542_at   | 1385017_at | 1379423_at   |
| 1382130_at   | 1393804_at | 1382778_at   |
| 1367652_at   | 1379077_at | 1385888_at   |
| 1396036_at   | 1375582_at | 1375612_at   |

| C1b          | C1b          |
|--------------|--------------|
| 5            | 5            |
| 1376872_at   | 1398840_at   |
| 1384393_at   | 1372642_at   |
| 1382682_at   | 1376098_a_at |
| 1375999_at   | 1376215_at   |
| 1393952_at   | 1380457_at   |
| 1372004_at   | 1384564_at   |
| 1393157_at   | 1388544_at   |
| 1385559_at   | 1386321_s_at |
| 1389507_at   | 1367767_at   |
| 1378120_at   | 1379907_at   |
| 1368358_a_at | 1377739_at   |
| 1385099_at   | 1390042_at   |
| 1393111_at   | 1373120_at   |
| 1373267_at   | 1376754_at   |
| 1392206_at   | 1378586_at   |
| 1372423_at   | 1367834_at   |
| 1379814_at   | 1379401_a_at |
| 1379757_at   | 1379477_at   |
| 1392999_at   | 1385464_at   |
| 1381770_at   | 1387645_at   |
| 1395456_at   | 1378536_at   |
| 1374367_at   | 1390114_at   |
| 1368545_at   | 1387201_at   |
| 1387660_at   | 1382319_at   |
| 1393283_at   | 1394297_at   |
| 1393547_at   | 1388659_at   |
| 1383846_at   | 1372851_at   |
| 1368059_at   | 1370902_at   |
| 1370361_at   | 1385325_at   |
| 1387766_a_at | 1368692_a_at |
| 1390912_at   | 1376988_at   |
| 1390707_at   | 1370694_at   |
| 1370450_at   | 1370336_at   |
| 1388802_at   | 1389054_at   |
| 1384921_at   | 1367774_at   |
| 1373085_at   | 1379486_at   |
| 1385587_at   | 1383304_at   |
| 1369590_a_at | 1381341_at   |
| 1369179_a_at | 1387221_at   |
| 1368238_at   | 1387818_at   |
| 1378855_a_at | 1371259_at   |
| 1374649_at   | 1368187_at   |
| 1396199_at   | 1374330_at   |

|            |              |              |
|------------|--------------|--------------|
| 1394504_at | 1372000_at   | 1379535_at   |
| 1383075_at | 1384542_at   | 1390467_at   |
| 1392523_at | 1398582_at   | 1382291_at   |
| 1374593_at | 1378493_at   | 1390347_at   |
| 1379409_at | 1382614_at   | 1370221_at   |
| 1390426_at | 1391474_at   | 1378453_at   |
| 1382952_at | 1383145_at   | 1373497_at   |
| 1378595_at | 1397779_at   | 1393752_at   |
| 1391794_at | 1380699_at   | 1378740_at   |
| 1392854_at | 1377974_at   | 1395021_at   |
| 1398846_at | 1390866_at   | 1379886_at   |
| 1392054_at | 1382913_at   | 1385044_at   |
| 1390704_at | 1384048_at   | 1389442_at   |
| 1379232_at | 1392717_at   | 1386063_at   |
| 1394784_at | 1370570_at   | 1368933_at   |
| 1377816_at | 1369215_a_at | 1382551_at   |
| 1377105_at | 1378282_at   | 1376654_at   |
| 1379130_at | 1392051_at   | 1391770_at   |
| 1380314_at | 1375785_at   | 1394756_at   |
| 1376739_at | 1387204_at   | 1381471_at   |
| 1395616_at | 1384610_at   | 1381753_at   |
| 1385041_at | 1393505_x_at | 1392675_at   |
| 1381809_at | 1383219_at   | 1382313_at   |
| 1385931_at | 1394483_at   | 1385903_at   |
| 1384293_at | 1391524_at   | 1382258_at   |
| 1380981_at | 1375469_at   | 1385925_at   |
| 1386525_at | 1380763_at   | 1379107_at   |
| 1398483_at | 1383615_a_at | 1376226_at   |
| 1389868_at | 1379221_at   | 1379112_at   |
| 1392902_at | 1394578_at   | 1389840_at   |
| 1368867_at | 1382960_at   | 1391968_at   |
| 1393881_at | 1373773_at   | 1370810_at   |
| 1382308_at | 1396225_at   | 1371005_at   |
| 1395836_at | 1394654_at   | 1391855_at   |
| 1377232_at | 1392245_at   | 1375724_at   |
| 1377427_at | 1376744_at   | 1391687_at   |
| 1395064_at | 1391594_at   | 1382939_at   |
| 1394935_at | 1389444_at   | 1378413_at   |
| 1378303_at | 1385350_at   | 1375426_a_at |
| 1376996_at | 1382584_at   | 1390443_at   |
| 1376256_at | 1379866_at   | 1375303_at   |
| 1391852_at | 1382898_at   | 1397286_at   |
| 1384809_at | 1384164_at   | 1378255_at   |
| 1384240_at | 1376619_at   | 1384609_a_at |
| 1390463_at | 1381296_at   | 1396403_at   |

|              |              |
|--------------|--------------|
| 1370944_at   | 1393441_at   |
| 1373606_at   | 1368072_at   |
| 1376174_at   | 1367624_at   |
| 1393747_at   | 1391121_at   |
| 1370936_at   | 1374819_at   |
| 1368720_at   | 1378605_at   |
| 1383879_at   | 1370695_s_at |
| 1368311_at   | 1388261_at   |
| 1377453_at   | 1372013_at   |
| 1383853_at   | 1368443_at   |
| 1368400_at   | 1384444_at   |
| 1371536_at   | 1392082_a_at |
| 1368622_at   | 1368708_a_at |
| 1388663_at   | 1367762_at   |
| 1368085_at   | 1369137_at   |
| 1383692_at   | 1391074_at   |
| 1381276_at   | 1383887_at   |
| 1374146_at   | 1382541_at   |
| 1387032_at   | 1386679_at   |
| 1393124_at   | 1384863_at   |
| 1368846_at   | 1387208_at   |
| 1380346_at   | 1376410_at   |
| 1394070_at   | 1368037_at   |
| 1367754_s_at | 1387395_at   |
| 1368559_at   | 1376788_at   |
| 1369755_at   | 1383220_at   |
| 1372832_at   | 1393957_at   |
| 1371134_at   | 1393190_at   |
| 1369204_at   | 1392077_at   |
| 1389500_at   | 1369165_at   |
| 1387951_at   | 1376417_at   |
| 1391707_at   | 1390473_at   |
| 1371162_at   | 1374095_at   |
| 1378498_at   | 1387799_at   |
| 1370139_a_at | 1371049_at   |
| 1392531_at   | 1374818_at   |
| 1390828_at   | 1375868_at   |
| 1380460_at   | 1373987_at   |
| 1371243_at   | 1387065_at   |
| 1376829_at   | 1369475_x_at |
| 1397850_at   | 1387578_a_at |
| 1381626_at   | 1388891_at   |
| 1383742_at   | 1369632_a_at |
| 1377517_at   | 1368595_at   |
| 1376579_at   | 1377176_at   |

|              |            |              |
|--------------|------------|--------------|
| 1384335_at   | 1397531_at | 1375215_x_at |
| 1385102_at   | 1379872_at | 1384339_s_at |
| 1385101_a_at | 1393622_at | 1367958_at   |
| 1394474_at   | 1398440_at | 1382382_at   |
| 1376490_at   | 1393582_at | 1391075_at   |
| 1393735_at   | 1392864_at | 1381100_at   |
| 1395336_at   | 1378624_at | 1385240_at   |
| 1384484_at   | 1376627_at | 1387233_at   |
| 1389972_at   | 1382489_at | 1376853_at   |
| 1388015_at   | 1376685_at | 1375703_at   |
| 1377556_at   | 1390858_at | 1376436_at   |
| 1382262_at   | 1391757_at | 1376644_at   |
| 1381229_at   | 1397630_at | 1383296_a_at |
| 1393454_at   | 1383726_at | 1378581_at   |
| 1384509_s_at | 1377345_at | 1378368_at   |
| 1384766_a_at | 1390757_at | 1380406_at   |
| 1381410_a_at | 1392806_at | 1389761_at   |
| 1381821_at   | 1374246_at | 1394493_at   |
| 1376843_at   | 1395015_at | 1395318_at   |
| 1381075_at   | 1375763_at | 1380525_at   |
| 1395762_at   | 1383253_at | 1384804_at   |
| 1395136_at   | 1392715_at | 1394576_at   |
| 1393613_at   | 1393643_at | 1383833_at   |
| 1383194_a_at | 1385953_at | 1397959_at   |
| 1374350_at   | 1392592_at | 1394422_at   |
| 1385163_at   | 1392198_at | 1391405_at   |
| 1375486_at   | 1384115_at | 1379603_at   |
| 1397889_at   | 1394425_at | 1383632_at   |
| 1381515_at   | 1379416_at | 1376523_at   |
| 1383829_at   | 1376933_at | 1388108_at   |
| 1375532_at   | 1385227_at | 1385552_at   |
| 1385923_at   | 1377072_at | 1377513_at   |
| 1380744_at   | 1392660_at | 1388866_at   |
| 1391222_at   | 1395986_at | 1388710_at   |
| 1393189_at   | 1380937_at | 1391436_at   |
| 1398595_at   | 1379286_at | 1379719_at   |
| 1395222_at   | 1385519_at | 1377686_at   |
| 1391128_at   | 1389989_at | 1375343_at   |
| 1370387_at   | 1371679_at | 1380552_at   |
| 1396437_at   | 1370830_at | 1378269_at   |
| 1383266_at   | 1377029_at | 1370089_at   |
| 1385157_at   | 1397676_at | 1384478_at   |
| 1380446_at   | 1382268_at | 1393585_at   |
| 1377774_at   | 1378457_at | 1371024_at   |
| 1389554_at   | 1384125_at | 1392044_at   |

|              |              |
|--------------|--------------|
| 1381064_at   | 1373782_a_at |
| 1368313_a_at | 1388099_a_at |
| 1369474_a_at | 1377056_at   |
| 1369019_at   | 1371908_at   |
| 1389092_at   | 1382002_at   |
| 1390607_at   | 1370805_at   |
| 1368927_at   | 1387063_at   |
| 1396176_at   | 1370922_at   |
| 1378539_at   | 1378479_at   |
| 1387179_at   | 1374724_at   |
| 1387269_s_at | 1387360_at   |
| 1396206_at   | 1379545_at   |
| 1389177_at   | 1380016_at   |
| 1394710_at   | 1389461_at   |
| 1384034_at   | 1382975_at   |
| 1368789_at   | 1376443_at   |
| 1383797_a_at | 1391586_at   |
| 1387369_at   | 1394522_at   |
| 1377168_at   | 1385229_at   |
| 1388077_a_at | 1367888_at   |
| 1367925_at   | 1370850_at   |
| 1373559_at   | 1368667_at   |
| 1391106_at   | 1393163_at   |
| 1368359_a_at | 1391656_at   |
| 1394908_at   | 1376345_at   |
| 1396387_at   | 1370964_at   |
| 1379363_at   |              |
| 1393729_at   |              |
| 1368916_at   |              |
| 1393706_at   |              |
| 1372590_at   |              |
| 1369664_at   |              |
| 1392948_at   |              |
| 1387523_at   |              |
| 1378400_at   |              |
| 1373783_at   |              |
| 1394855_at   |              |
| 1378315_at   |              |
| 1374948_at   |              |
| 1398431_at   |              |
| 1374787_at   |              |
| 1389350_at   |              |
| 1388187_at   |              |
| 1368300_at   |              |
| 1378470_at   |              |

|              |              |              |
|--------------|--------------|--------------|
| 1388999_at   | 1390266_at   | 1394626_at   |
| 1383127_at   | 1398420_at   | 1369654_at   |
| 1396550_at   | 1391439_at   | 1378610_at   |
| 1379912_at   | 1397179_at   | 1396256_at   |
| 1385638_at   | 1392764_at   | 1383552_at   |
| 1378389_at   | 1383112_at   | 1393661_at   |
| 1373463_at   | 1390506_at   | 1398202_at   |
| 1368770_at   | 1374909_at   | 1369404_a_at |
| 1383527_at   | 1393981_at   | 1379126_at   |
| 1376755_at   | 1380824_at   | 1398739_at   |
| 1370678_s_at | 1370085_at   | 1369499_at   |
| 1383199_at   | 1384587_at   | 1391569_at   |
| 1393672_at   | 1390592_at   | 1391187_at   |
| 1382452_at   | 1389998_at   | 1377508_at   |
| 1392842_at   | 1394849_at   | 1395546_at   |
| 1372814_at   | 1380547_at   | 1376848_at   |
| 1382776_at   | 1392453_at   | 1384168_at   |
| 1379724_at   | 1391089_at   | 1381167_at   |
| 1384250_a_at | 1373494_at   | 1394824_at   |
| 1391979_at   | 1389116_at   | 1395361_at   |
| 1395333_at   | 1368824_at   | 1369756_a_at |
| 1375358_at   | 1379733_at   | 1379492_at   |
| 1375011_at   | 1395075_at   | 1388527_at   |
| 1370072_at   | 1391297_at   | 1369957_at   |
| 1370465_at   | 1392653_at   | 1376623_at   |
| 1382211_at   | 1370267_at   | 1371541_at   |
| 1374676_at   | 1387165_at   | 1393167_at   |
| 1393811_at   | 1368842_at   | 1398649_at   |
| 1393777_at   | 1377070_at   | 1385354_at   |
| 1375350_at   | 1368958_at   | 1371472_at   |
| 1398500_at   | 1390184_at   | 1377675_at   |
| 1370145_at   | 1391743_at   | 1371034_at   |
| 1373666_at   | 1376419_at   | 1395255_at   |
| 1376610_a_at | 1375723_at   | 1371281_at   |
| 1391428_at   | 1383052_a_at | 1392295_a_at |
| 1390687_at   | 1390871_at   | 1392607_at   |
| 1370205_at   | 1384857_at   | 1390097_at   |
| 1368221_at   | 1382368_at   | 1392582_at   |
| 1377640_at   | 1394436_at   | 1378904_at   |
| 1390782_at   | 1385108_at   |              |
| 1371951_at   | 1394010_at   |              |
| 1369156_at   | 1380545_at   |              |
| 1389632_at   | 1379645_at   |              |
| 1368691_at   | 1375552_at   |              |
| 1398727_at   | 1379544_at   |              |

|              |  |
|--------------|--|
| 1393081_at   |  |
| 1393307_at   |  |
| 1375925_at   |  |
| 1369717_at   |  |
| 1388219_at   |  |
| 1388968_at   |  |
| 1378557_at   |  |
| 1372989_at   |  |
| 1377034_at   |  |
| 1395655_at   |  |
| 1385434_at   |  |
| 1371801_at   |  |
| 1374117_at   |  |
| 1369752_a_at |  |
| 1379022_at   |  |
| 1389007_at   |  |
| 1368412_a_at |  |
| 1368355_at   |  |
| 1374672_at   |  |
| 1372844_at   |  |
| 1369050_at   |  |
| 1384667_x_at |  |
| 1398623_at   |  |
| 1371883_at   |  |
| 1372755_at   |  |
| 1377885_at   |  |
| 1395673_at   |  |
| 1387543_at   |  |
| 1368194_at   |  |
| 1385176_at   |  |
| 1390999_at   |  |
| 1384683_at   |  |
| 1368197_at   |  |
| 1378818_at   |  |
| 1395536_at   |  |
| 1384526_at   |  |
| 1377867_at   |  |
| 1384165_at   |  |
| 1378111_at   |  |
| 1381080_at   |  |
| 1381233_at   |  |
| 1376893_at   |  |
| 1391879_at   |  |
| 1396687_at   |  |
| 1392425_x_at |  |

|              |            |  |
|--------------|------------|--|
| 1377934_at   | 1370035_at |  |
| 1392231_at   | 1367884_at |  |
| 1377090_at   | 1375524_at |  |
| 1374320_at   | 1391438_at |  |
| 1374779_at   | 1390048_at |  |
| 1380600_at   | 1370176_at |  |
| 1385525_at   | 1379509_at |  |
| 1387154_at   | 1374066_at |  |
| 1379387_at   | 1370262_at |  |
| 1384180_at   | 1392180_at |  |
| 1379055_x_at | 1384759_at |  |
| 1377051_at   | 1381048_at |  |
| 1383932_at   | 1376080_at |  |
| 1389601_at   | 1377526_at |  |
| 1383644_at   | 1379941_at |  |
| 1371483_at   | 1383069_at |  |
| 1377308_a_at | 1375545_at |  |
| 1377266_at   | 1379313_at |  |
| 1372002_at   | 1384948_at |  |
| 1383353_at   | 1375278_at |  |
| 1393589_at   | 1382303_at |  |

|            |  |
|------------|--|
| 1381173_at |  |
| 1372885_at |  |
| 1393147_at |  |
| 1379425_at |  |
| 1378274_at |  |
| 1393047_at |  |
| 1392274_at |  |
| 1375051_at |  |
| 1374632_at |  |
| 1372808_at |  |
| 1376076_at |  |
| 1393057_at |  |
| 1384522_at |  |
| 1382739_at |  |
| 1373632_at |  |
| 1389573_at |  |
| 1375052_at |  |
| 1376195_at |  |
| 1388919_at |  |
| 1384488_at |  |
| 1379493_at |  |
