# Supplementary material
Source: PubMed Central journal article supplement (PMC7340531)
Supplement: NIHMS1589953-supplement-23.pdf [file NIHMS1589953-supplement-23.pdf]

**Extended Data Table 2**

| Up Regulated in APC <sup>+/+</sup> Pirc <sup>+/+</sup> OX in relation to wild-type |                  |             |      |             |            |             |             |            |             |
|------------------------------------------------------------------------------------|------------------|-------------|------|-------------|------------|-------------|-------------|------------|-------------|
| NAME                                                                               | GS<br> follow li | GS DETAILS  | SIZE | ES          | NES        | NOM p-val   | FDR q-val   | FWER p-val | RANK AT MAX |
| NUCLEOLAR PART                                                                     | NUCLEOLAR P      | Details ... | 58   | -0.6006561  | -2.1327953 | 0           | 0.0525942   | 0.055      | 4810        |
| PARTURITION                                                                        | PARTURITION      | Details ... | 18   | -0.76409274 | -2.103174  | 0           | 0.043199193 | 0.088      | 1359        |
| NEGATIVE REGULATION OF HORMONE SECRETION                                           | NEGATIVE REG     | Details ... | 70   | -0.5564646  | -2.0809677 | 0           | 0.04139415  | 0.123      | 1315        |
| TRANSLATIONAL ELONGATION                                                           | TRANSLATION      | Details ... | 106  | -0.51414555 | -2.071338  | 0           | 0.03434976  | 0.135      | 5412        |
| REGULATION OF TYROSINE PHOSPHORYLATION OF STAT3 PROTEIN                            | REGULATION       | Details ... | 38   | -0.61759853 | -2.0574071 | 0           | 0.03441299  | 0.165      | 1359        |
| ACUTE PHASE RESPONSE                                                               | ACUTE PHASE      | Details ... | 34   | -0.6394826  | -2.0536501 | 0           | 0.02992805  | 0.172      | 976         |
| TRANSLATIONAL TERMINATION                                                          | TRANSLATION      | Details ... | 90   | -0.5214301  | -2.052021  | 0           | 0.026459541 | 0.178      | 5033        |
| CELLULAR RESPONSE TO INTERLEUKIN 6                                                 | CELLULAR RES     | Details ... | 20   | -0.71682686 | -2.0428407 | 0           | 0.027400717 | 0.204      | 135         |
| CD4 POSITIVE ALPHA BETA T CELL ACTIVATION                                          | CD4 POSITIVE     | Details ... | 29   | -0.6542219  | -2.0407088 | 0           | 0.025515366 | 0.212      | 1359        |
| NEUROPEPTIDE HORMONE ACTIVITY                                                      | NEUROPEPTID      | Details ... | 25   | -0.6644572  | -2.0165114 | 0           | 0.030778589 | 0.271      | 3848        |
| RESPONSE TO INTERLEUKIN 6                                                          | RESPONSE TO      | Details ... | 24   | -0.6991114  | -2.0083828 | 0           | 0.03079357  | 0.292      | 783         |
| REGULATION OF CIRCADIAN SLEEP WAKE CYCLE                                           | REGULATION       | Details ... | 23   | -0.6778624  | -1.9815817 | 0           | 0.041674998 | 0.401      | 1359        |
| MITOCHONDRIAL TRANSLATION                                                          | MITOCHONDR       | Details ... | 103  | -0.49125695 | -1.9778397 | 0           | 0.040424347 | 0.416      | 5033        |
| CELLULAR RESPONSE TO CORTICOSTEROID STIMULUS                                       | CELLULAR RES     | Details ... | 55   | -0.5542193  | -1.9655665 | 0           | 0.04424591  | 0.477      | 459         |
| RESPONSE TO INTERLEUKIN 1                                                          | RESPONSE TO      | Details ... | 91   | -0.49679404 | -1.9585394 | 0           | 0.045131046 | 0.516      | 1171        |
| PRERIBOSOME                                                                        | PRERIBOSOME      | Details ... | 52   | -0.5536905  | -1.9569926 | 0           | 0.04265956  | 0.518      | 5581        |
| MONOCYTE CHEMOTAXIS                                                                | MONOCYTE CH      | Details ... | 25   | -0.66094345 | -1.9483496 | 0           | 0.04529107  | 0.561      | 470         |
| POSITIVE REGULATION OF T HELPER CELL DIFFERENTIATION                               | POSITIVE REG     | Details ... | 15   | -0.7229009  | -1.9468211 | 0.002105263 | 0.043553904 | 0.568      | 2           |
| REGULATION OF VASODILATION                                                         | REGULATION       | Details ... | 42   | -0.56943715 | -1.9215052 | 0           | 0.057796985 | 0.694      | 2209        |
| PEPTIDE SECRETION                                                                  | PEPTIDE SECR     | Details ... | 55   | -0.53095704 | -1.9176296 | 0           | 0.05077113  | 0.703      | 319         |
| MATURATION OF SSU RRNA                                                             | MATURATION       | Details ... | 39   | -0.5764421  | -1.9105362 | 0           | 0.058608096 | 0.724      | 4894        |
| RIBOSOME BIOGENESIS                                                                | RIBOSOME BIC     | Details ... | 280  | -0.41458735 | -1.9035401 | 0           | 0.06043072  | 0.753      | 4909        |
| REGULATION OF T HELPER CELL DIFFERENTIATION                                        | REGULATION       | Details ... | 19   | -0.6855839  | -1.9009429 | 0.002227172 | 0.0598399   | 0.764      | 2           |
| POSITIVE REGULATION OF TYROSINE PHOSPHORYLATION OF STAT3 PR                        | POSITIVE REG     | Details ... | 31   | -0.607626   | -1.899474  | 0           | 0.05859747  | 0.771      | 1359        |
| ARACHIDONIC ACID METABOLIC PROCESS                                                 | ARACHIDONIC      | Details ... | 30   | -0.6091334  | -1.8987209 | 0           | 0.05666881  | 0.772      | 1316        |
| NEGATIVE REGULATION OF BEHAVIOR                                                    | NEGATIVE REG     | Details ... | 16   | -0.7276433  | -1.8984941 | 0           | 0.054633893 | 0.773      | 1359        |
| RIBOSOME                                                                           | RIBOSOME         | Details ... | 205  | -0.43139622 | -1.8959061 | 0           | 0.05382831  | 0.783      | 6908        |
| NEUTROPHIL MEDIATED IMMUNITY                                                       | NEUTROPHIL       | Details ... | 15   | -0.7247133  | -1.8949344 | 0.002057613 | 0.05227384  | 0.785      | 275         |
| SMALL NUCLEOLAR RIBONUCLEOPROTEIN COMPLEX                                          | SMALL NUCLE      | Details ... | 18   | -0.689783   | -1.8903326 | 0           | 0.053187467 | 0.806      | 3711        |
| REGULATION OF NEUROTRANSMITTER UPTAKE                                              | REGULATION       | Details ... | 15   | -0.7222038  | -1.8896916 | 0           | 0.051758274 | 0.809      | 161         |
| ARGININE METABOLIC PROCESS                                                         | ARGININE MET     | Details ... | 17   | -0.68985146 | -1.8859904 | 0.002192983 | 0.0527589   | 0.828      | 484         |
| NEUROPEPTIDE SIGNALING PATHWAY                                                     | NEUROPEPTID      | Details ... | 76   | -0.49999642 | -1.8819045 | 0           | 0.053985182 | 0.843      | 2640        |
| HORMONE ACTIVITY                                                                   | HORMONE AC       | Details ... | 86   | -0.48289585 | -1.8786637 | 0           | 0.05448446  | 0.853      | 1128        |
| RESPONSE TO DEXAMETHASONE                                                          | RESPONSE TO      | Details ... | 33   | -0.58670306 | -1.8772223 | 0           | 0.05401279  | 0.859      | 1038        |
| DEFENSE RESPONSE TO GRAM POSITIVE BACTERIUM                                        | DEFENSE RES      | Details ... | 45   | -0.5426134  | -1.8711301 | 0.002227172 | 0.05619107  | 0.877      | 360         |
| CELLULAR RESPONSE TO DEXAMETHASONE STIMULUS                                        | CELLULAR RES     | Details ... | 27   | -0.6205979  | -1.8705033 | 0           | 0.05502473  | 0.878      | 459         |
| PEPTIDE HORMONE RECEPTOR BINDING                                                   | PEPTIDE HORN     | Details ... | 16   | -0.71249783 | -1.870344  | 0           | 0.05371582  | 0.878      | 1038        |
| NEGATIVE REGULATION OF CYTOKINE BIOSYNTHETIC PROCESS                               | NEGATIVE REG     | Details ... | 23   | -0.6406753  | -1.8698264 | 0           | 0.052722864 | 0.879      | 197         |
| REGULATION OF NEUROLOGICAL SYSTEM PROCESS                                          | REGULATION       | Details ... | 61   | -0.51299596 | -1.8697813 | 0           | 0.051370997 | 0.879      | 1373        |
| RIBOSOME ASSEMBLY                                                                  | RIBOSOME ASS     | Details ... | 47   | -0.54161465 | -1.8631577 | 0.002375297 | 0.053890973 | 0.898      | 4181        |
| RRNA METABOLIC PROCESS                                                             | RRNA METABO      | Details ... | 232  | -0.42109925 | -1.8628715 | 0           | 0.05273684  | 0.898      | 5924        |

|                                                             |               |             |     |             |            |             |             |       |      |
|-------------------------------------------------------------|---------------|-------------|-----|-------------|------------|-------------|-------------|-------|------|
| ALPHA BETA T CELL ACTIVATION                                | ALPHA BETA T  | Details ... | 42  | -0.551507   | -1.8624436 | 0           | 0.051684488 | 0.9   | 1359 |
| REGULATION OF RENAL SYSTEM PROCESS                          | REGULATION O  | Details ... | 34  | -0.5793682  | -1.8566442 | 0           | 0.053712733 | 0.909 | 2943 |
| 90S PRERIBOSOME                                             | 90S PRERIBOS  | Details ... | 22  | -0.6464757  | -1.8565722 | 0.006564552 | 0.052556306 | 0.909 | 5017 |
| POSITIVE REGULATION OF SMOOTH MUSCLE CONTRACTION            | POSITIVE REGU | Details ... | 26  | -0.6096725  | -1.8508208 | 0.002020202 | 0.054939564 | 0.923 | 1023 |
| REGULATION OF NITRIC OXIDE SYNTHASE BIOSYNTHETIC PROCESS    | REGULATION O  | Details ... | 16  | -0.6895947  | -1.8404835 | 0.00210084  | 0.060514305 | 0.944 | 1359 |
| POSITIVE REGULATION OF VASODILATION                         | POSITIVE REGU | Details ... | 29  | -0.59542114 | -1.8394903 | 0           | 0.059689015 | 0.944 | 900  |
| RESPONSE TO COLD                                            | RESPONSE TO   | Details ... | 37  | -0.5528324  | -1.8353885 | 0.002192983 | 0.061184622 | 0.951 | 1150 |
| POSITIVE REGULATION OF INFLAMMATORY RESPONSE                | POSITIVE REGU | Details ... | 83  | -0.46864662 | -1.8312312 | 0           | 0.0628278   | 0.956 | 917  |
| SMALL SUBUNIT PROCESSOME                                    | SMALL SUBUN   | Details ... | 30  | -0.58187366 | -1.8272423 | 0.002145923 | 0.06401419  | 0.963 | 5765 |
| VASCULAR PROCESS IN CIRCULATORY SYSTEM                      | VASCULAR PR   | Details ... | 152 | -0.43414718 | -1.8268363 | 0           | 0.06308989  | 0.964 | 2107 |
| INTRINSIC APOPTOTIC SIGNALING PATHWAY IN RESPONSE TO ENDOPL | INTRINSIC APO | Details ... | 29  | -0.57496345 | -1.8192376 | 0.002232143 | 0.06667311  | 0.969 | 2283 |
| NCRNA PROCESSING                                            | NCRNA PROC    | Details ... | 332 | -0.3894126  | -1.8188677 | 0           | 0.065573536 | 0.971 | 5935 |
| POSITIVE REGULATION OF BLOOD CIRCULATION                    | POSITIVE REGU | Details ... | 87  | -0.47386122 | -1.8163941 | 0           | 0.066034235 | 0.975 | 1023 |
| POSITIVE REGULATION OF IMMUNOGLOBULIN PRODUCTION            | POSITIVE REGU | Details ... | 29  | -0.5826723  | -1.8153062 | 0.008810572 | 0.065484665 | 0.975 | 508  |
| PORPHYRIN CONTAINING COMPOUND METABOLIC PROCESS             | PORPHYRIN C   | Details ... | 34  | -0.56016403 | -1.81263   | 0.002392344 | 0.06625171  | 0.977 | 3591 |
| ACUTE INFLAMMATORY RESPONSE                                 | ACUTE INFLAM  | Details ... | 62  | -0.49246898 | -1.8090931 | 0           | 0.06716453  | 0.98  | 976  |
| POSITIVE REGULATION OF VASOCONSTRICTION                     | POSITIVE REGU | Details ... | 35  | -0.55808604 | -1.8064594 | 0.004705882 | 0.06786971  | 0.983 | 1005 |
| REGULATION OF BEHAVIOR                                      | REGULATION O  | Details ... | 55  | -0.50086963 | -1.8056107 | 0           | 0.067197666 | 0.983 | 1569 |
| REGULATION OF EXCRETION                                     | REGULATION O  | Details ... | 27  | -0.58789206 | -1.801138  | 0.006741573 | 0.06911023  | 0.986 | 1359 |
| LARGE RIBOSOMAL SUBUNIT                                     | LARGE RIBOSC  | Details ... | 85  | -0.46640182 | -1.799376  | 0           | 0.06899603  | 0.988 | 6761 |
| REGULATION OF RENAL SODIUM EXCRETION                        | REGULATION O  | Details ... | 22  | -0.6254262  | -1.7989463 | 0.010729614 | 0.06820163  | 0.988 | 2338 |
| REGULATION OF SYNAPTIC TRANSMISSION DOPAMINERGIC            | REGULATION O  | Details ... | 16  | -0.67172843 | -1.7976642 | 0.006355932 | 0.068061754 | 0.989 | 138  |
| RIBOSOMAL SUBUNIT                                           | RIBOSOMAL SU  | Details ... | 149 | -0.41884616 | -1.7883054 | 0           | 0.073387496 | 0.993 | 7124 |
| RRNA TRANSCRIPTION                                          | RRNA TRANSC   | Details ... | 16  | -0.6773662  | -1.7872491 | 0.002061856 | 0.07292507  | 0.994 | 1062 |
| SYNAPTIC TRANSMISSION CHOLINERGIC                           | SYNAPTIC TRA  | Details ... | 31  | -0.562881   | -1.7865131 | 0           | 0.07241493  | 0.995 | 4307 |
| NCRNA METABOLIC PROCESS                                     | NCRNA METAB   | Details ... | 451 | -0.37245378 | -1.7856072 | 0           | 0.07198153  | 0.995 | 5986 |
| RESPONSE TO SALT                                            | RESPONSE TO   | Details ... | 16  | -0.67460734 | -1.7760954 | 0.002087683 | 0.07748433  | 0.998 | 1359 |
| POSITIVE REGULATION OF AMINE TRANSPORT                      | POSITIVE REGU | Details ... | 32  | -0.55732644 | -1.7756541 | 0.004310345 | 0.0766345   | 0.999 | 386  |
| MATURATION OF SSU RRNA FROM TRICISTRONIC RRNA TRANSCRIPT    | MATURATION    | Details ... | 32  | -0.5586658  | -1.7755531 | 0.006864989 | 0.0756209   | 0.999 | 4894 |
| NEUROPEPTIDE RECEPTOR BINDING                               | NEUROPEPTID   | Details ... | 23  | -0.6144161  | -1.7745613 | 0.002132196 | 0.075324066 | 0.999 | 1038 |
| POSITIVE REGULATION OF NEUROLOGICAL SYSTEM PROCESS          | POSITIVE REGU | Details ... | 17  | -0.65589446 | -1.7711015 | 0.004273505 | 0.07657306  | 0.999 | 716  |
| ALPHA BETA T CELL DIFFERENTIATION                           | ALPHA BETA T  | Details ... | 37  | -0.54395115 | -1.7666535 | 0.004672897 | 0.079118565 | 0.999 | 1359 |
| DEATH RECEPTOR BINDING                                      | DEATH RECEP   | Details ... | 17  | -0.6517083  | -1.7654413 | 0.00409836  | 0.07893731  | 0.999 | 4370 |
| REGULATION OF RESPONSE TO INTERFERON GAMMA                  | REGULATION O  | Details ... | 22  | -0.6064194  | -1.7622092 | 0.006410257 | 0.080279015 | 0.999 | 299  |
| T CELL DIFFERENTIATION INVOLVED IN IMMUNE RESPONSE          | T CELL DIFFER | Details ... | 24  | -0.5961816  | -1.7616808 | 0.006535948 | 0.07964152  | 0.999 | 140  |
| CELLULAR RESPONSE TO INTERLEUKIN 1                          | CELLULAR RES  | Details ... | 67  | -0.47468987 | -1.7604797 | 0.002525253 | 0.07932866  | 0.999 | 1359 |
| POSITIVE REGULATION OF MUSCLE CONTRACTION                   | POSITIVE REGU | Details ... | 39  | -0.5274248  | -1.7587407 | 0.004926108 | 0.079649255 | 0.999 | 400  |
| FERTILIZATION                                               | FERTILIZATION | Details ... | 90  | -0.4426672  | -1.7575744 | 0           | 0.079412885 | 0.999 | 3191 |
| MATURATION OF 58S RRNA                                      | MATURATION    | Details ... | 27  | -0.5572005  | -1.7552909 | 0.004728132 | 0.08021349  | 0.999 | 4716 |
| NEGATIVE REGULATION OF COAGULATION                          | NEGATIVE REG  | Details ... | 41  | -0.5172662  | -1.7550461 | 0.002403846 | 0.07939759  | 0.999 | 1917 |
| ORGAN OR TISSUE SPECIFIC IMMUNE RESPONSE                    | ORGAN OR TIS  | Details ... | 17  | -0.656976   | -1.7540039 | 0.010373444 | 0.079255655 | 0.999 | 44   |
| RESPONSE TO AMINE                                           | RESPONSE TO   | Details ... | 45  | -0.51388276 | -1.7515258 | 0.002283105 | 0.08031664  | 0.999 | 739  |
| REACTIVE NITROGEN SPECIES METABOLIC PROCESS                 | REACTIVE NITR | Details ... | 17  | -0.6334953  | -1.7510895 | 0.008385744 | 0.07971953  | 0.999 | 1839 |

|                                                                                 |                                                                                 |             |     |             |            |             |             |       |      |
|---------------------------------------------------------------------------------|---------------------------------------------------------------------------------|-------------|-----|-------------|------------|-------------|-------------|-------|------|
| NEGATIVE REGULATION OF FAT CELL DIFFERENTIATION                                 | NEGATIVE REGULATION OF FAT CELL DIFFERENTIATION                                 | Details ... | 36  | -0.532201   | -1.7431977 | 0.004444445 | 0.084675536 | 0.999 | 319  |
| REGULATION OF IMMUNOGLOBULIN PRODUCTION                                         | REGULATION OF IMMUNOGLOBULIN PRODUCTION                                         | Details ... | 44  | -0.50745904 | -1.7398577 | 0.002386635 | 0.086245276 | 1     | 1368 |
| REGULATION OF GLUCONEOGENESIS                                                   | REGULATION OF GLUCONEOGENESIS                                                   | Details ... | 32  | -0.5385388  | -1.7388082 | 0.006622517 | 0.08608628  | 1     | 52   |
| RESPONSE TO IMMOBILIZATION STRESS                                               | RESPONSE TO IMMOBILIZATION STRESS                                               | Details ... | 20  | -0.6245355  | -1.7342497 | 0.008849558 | 0.08880805  | 1     | 1401 |
| HEME METABOLIC PROCESS                                                          | HEME METABOLIC PROCESS                                                          | Details ... | 28  | -0.5546032  | -1.730616  | 0.004555809 | 0.0910437   | 1     | 3591 |
| RIBONUCLEOPROTEIN COMPLEX BIOGENESIS                                            | RIBONUCLEOPROTEIN COMPLEX BIOGENESIS                                            | Details ... | 394 | -0.36640283 | -1.7248359 | 0           | 0.094531156 | 1     | 6143 |
| LEUKOCYTE APOPTOTIC PROCESS                                                     | LEUKOCYTE APOPTOTIC PROCESS                                                     | Details ... | 19  | -0.6230631  | -1.7228842 | 0.006479482 | 0.09538452  | 1     | 531  |
| NITRIC OXIDE METABOLIC PROCESS                                                  | NITRIC OXIDE METABOLIC PROCESS                                                  | Details ... | 15  | -0.65519947 | -1.7213454 | 0.008752735 | 0.095654845 | 1     | 1839 |
| ORGANELLAR RIBOSOME                                                             | ORGANELLAR RIBOSOME                                                             | Details ... | 67  | -0.46560308 | -1.7185049 | 0.002583979 | 0.09717457  | 1     | 5033 |
| CELLULAR PROTEIN COMPLEX DISASSEMBLY                                            | CELLULAR PROTEIN COMPLEX DISASSEMBLY                                            | Details ... | 116 | -0.41859972 | -1.7181016 | 0.002941177 | 0.09644015  | 1     | 5033 |
| RESPONSE TO MANGANESE ION                                                       | RESPONSE TO MANGANESE ION                                                       | Details ... | 15  | -0.6480533  | -1.7172576 | 0.010141988 | 0.09606824  | 1     | 1597 |
| PROSTANOID METABOLIC PROCESS                                                    | PROSTANOID METABOLIC PROCESS                                                    | Details ... | 22  | -0.58687353 | -1.7170697 | 0.006564552 | 0.09528247  | 1     | 1316 |
| POSITIVE REGULATION OF REACTIVE OXYGEN SPECIES BIOSYNTHETIC PROCESS             | POSITIVE REGULATION OF REACTIVE OXYGEN SPECIES BIOSYNTHETIC PROCESS             | Details ... | 43  | -0.51004577 | -1.715787  | 0.007263923 | 0.0953731   | 1     | 198  |
| QUINONE METABOLIC PROCESS                                                       | QUINONE METABOLIC PROCESS                                                       | Details ... | 24  | -0.57202625 | -1.7152073 | 0.006564552 | 0.094879024 | 1     | 3141 |
| REGULATION OF COLLATERAL SPROUTING                                              | REGULATION OF COLLATERAL SPROUTING                                              | Details ... | 16  | -0.64614403 | -1.7150682 | 0.006263048 | 0.094015524 | 1     | 2374 |
| MATURATION OF 5 S RRNA FROM TRICISTRONIC RRNA TRANSCRIPT                        | MATURATION OF 5 S RRNA FROM TRICISTRONIC RRNA TRANSCRIPT                        | Details ... | 19  | -0.59864265 | -1.713133  | 0.010729614 | 0.09474787  | 1     | 4716 |
| GROWTH FACTOR ACTIVITY                                                          | GROWTH FACTOR ACTIVITY                                                          |             | 138 | -0.40393028 | -1.7130457 | 0           | 0.09385669  | 1     | 1513 |
| MYELOID LEUKOCYTE MEDIATED IMMUNITY                                             | MYELOID LEUKOCYTE MEDIATED IMMUNITY                                             |             | 33  | -0.54154813 | -1.7119161 | 0.006410257 | 0.093793936 | 1     | 275  |
| OXIDOREDUCTASE ACTIVITY ACTING ON SINGLE DONORS WITH INCORPORATION OF COFACTORS | OXIDOREDUCTASE ACTIVITY ACTING ON SINGLE DONORS WITH INCORPORATION OF COFACTORS |             | 22  | -0.59569514 | -1.7105917 | 0.013274336 | 0.09379449  | 1     | 975  |
| REGULATION OF FATTY ACID BIOSYNTHETIC PROCESS                                   | REGULATION OF FATTY ACID BIOSYNTHETIC PROCESS                                   |             | 33  | -0.53827536 | -1.7097352 | 0.015021459 | 0.0936153   | 1     | 2107 |
| FATTY ACID DERIVATIVE METABOLIC PROCESS                                         | FATTY ACID DERIVATIVE METABOLIC PROCESS                                         |             | 60  | -0.47615    | -1.7089449 | 0.005089059 | 0.093277216 | 1     | 316  |
| FATTY ACID DERIVATIVE BIOSYNTHETIC PROCESS                                      | FATTY ACID DERIVATIVE BIOSYNTHETIC PROCESS                                      |             | 34  | -0.5260888  | -1.7059797 | 0.007281554 | 0.094668284 | 1     | 216  |
| REGULATION OF VASCULAR ENDOTHELIAL GROWTH FACTOR PRODUCTION                     | REGULATION OF VASCULAR ENDOTHELIAL GROWTH FACTOR PRODUCTION                     |             | 29  | -0.54771656 | -1.7005769 | 0.006818182 | 0.09857468  | 1     | 1150 |
| RESPONSE TO AUDITORY STIMULUS                                                   | RESPONSE TO AUDITORY STIMULUS                                                   |             | 22  | -0.578965   | -1.6962916 | 0.010706638 | 0.101665884 | 1     | 456  |
| ACETYLCHOLINE RECEPTOR ACTIVITY                                                 | ACETYLCHOLINE RECEPTOR ACTIVITY                                                 |             | 26  | -0.56859523 | -1.6951098 | 0.010964912 | 0.10175026  | 1     | 3290 |
| QUATERNARY AMMONIUM GROUP BINDING                                               | QUATERNARY AMMONIUM GROUP BINDING                                               |             | 42  | -0.503441   | -1.6921906 | 0.011709602 | 0.103321455 | 1     | 1860 |
| POSITIVE REGULATION OF ADENYLATE CYCLASE ACTIVITY                               | POSITIVE REGULATION OF ADENYLATE CYCLASE ACTIVITY                               |             | 43  | -0.49576235 | -1.6889213 | 0.006976744 | 0.104945175 | 1     | 922  |
| ORGANELLAR LARGE RIBOSOMAL SUBUNIT                                              | ORGANELLAR LARGE RIBOSOMAL SUBUNIT                                              |             | 29  | -0.5487995  | -1.6877773 | 0.011389522 | 0.104930736 | 1     | 5412 |
| PTERIDINE CONTAINING COMPOUND BIOSYNTHETIC PROCESS                              | PTERIDINE CONTAINING COMPOUND BIOSYNTHETIC PROCESS                              |             | 16  | -0.6346818  | -1.6873835 | 0.012526096 | 0.10433505  | 1     | 3247 |
| MUSCLE CELL CELLULAR HOMEOSTASIS                                                | MUSCLE CELL CELLULAR HOMEOSTASIS                                                |             | 18  | -0.61325896 | -1.6870475 | 0.013186813 | 0.10376585  | 1     | 16   |
| UNSATURATED FATTY ACID BIOSYNTHETIC PROCESS                                     | UNSATURATED FATTY ACID BIOSYNTHETIC PROCESS                                     |             | 41  | -0.49552295 | -1.686357  | 0.002427185 | 0.10348446  | 1     | 216  |
| TRNA PROCESSING                                                                 | TRNA PROCESSING                                                                 |             | 89  | -0.42754707 | -1.6849967 | 0.005434783 | 0.10371124  | 1     | 3736 |
| DEFENSE RESPONSE TO GRAM NEGATIVE BACTERIUM                                     | DEFENSE RESPONSE TO GRAM NEGATIVE BACTERIUM                                     |             | 28  | -0.54311615 | -1.6814405 | 0.013888889 | 0.10608895  | 1     | 349  |
| POSITIVE REGULATION OF LYASE ACTIVITY                                           | POSITIVE REGULATION OF LYASE ACTIVITY                                           |             | 54  | -0.4726829  | -1.6809183 | 0.007407407 | 0.10574077  | 1     | 922  |
| TRNA SPECIFIC RIBONUCLEASE ACTIVITY                                             | TRNA SPECIFIC RIBONUCLEASE ACTIVITY                                             |             | 15  | -0.65101033 | -1.6801977 | 0.008230452 | 0.1054935   | 1     | 3590 |
| REGULATION OF TYROSINE PHOSPHORYLATION OF STAT PROTEIN                          | REGULATION OF TYROSINE PHOSPHORYLATION OF STAT PROTEIN                          |             | 58  | -0.4617476  | -1.6759759 | 0.004950495 | 0.10805049  | 1     | 1359 |
| EATING BEHAVIOR                                                                 | EATING BEHAVIOR                                                                 |             | 27  | -0.54658437 | -1.6738708 | 0.016587678 | 0.109152466 | 1     | 917  |
| CYTOSOLIC LARGE RIBOSOMAL SUBUNIT                                               | CYTOSOLIC LARGE RIBOSOMAL SUBUNIT                                               |             | 54  | -0.46377632 | -1.6736087 | 0.007125891 | 0.10852884  | 1     | 7455 |
| TRNA METABOLIC PROCESS                                                          | TRNA METABOLIC PROCESS                                                          |             | 146 | -0.39484602 | -1.6662222 | 0           | 0.11458175  | 1     | 3736 |
| CYTOKINE ACTIVITY                                                               | CYTOKINE ACTIVITY                                                               |             | 148 | -0.39194697 | -1.6632221 | 0           | 0.11651573  | 1     | 1088 |
| GLUTATHIONE METABOLIC PROCESS                                                   | GLUTATHIONE METABOLIC PROCESS                                                   |             | 51  | -0.46978927 | -1.6630397 | 0.004938272 | 0.115741596 | 1     | 4241 |
| REGULATION OF CELLULAR AMINO ACID METABOLIC PROCESS                             | REGULATION OF CELLULAR AMINO ACID METABOLIC PROCESS                             |             | 61  | -0.45803833 | -1.6625749 | 0.004842615 | 0.115270555 | 1     | 5930 |
| FEEDING BEHAVIOR                                                                | FEEDING BEHAVIOR                                                                |             | 78  | -0.44435227 | -1.662473  | 0           | 0.11442946  | 1     | 917  |

|                                                                 |                              |     |             |            |             |             |   |      |
|-----------------------------------------------------------------|------------------------------|-----|-------------|------------|-------------|-------------|---|------|
| NEGATIVE REGULATION OF CIRCADIAN RHYTHM                         | NEGATIVE REGULATION OF CIR   | 15  | -0.6286619  | -1.6611662 | 0.008196721 | 0.11481393  | 1 | 1359 |
| RESPONSE TO DIETARY EXCESS                                      | RESPONSE TO DIETARY EXCES    | 20  | -0.5893722  | -1.6533198 | 0.015384615 | 0.12180893  | 1 | 900  |
| SMOOTH MUSCLE CONTRACTION                                       | SMOOTH MUSCLE CONTRACTIO     | 44  | -0.47343296 | -1.653036  | 0.007194245 | 0.12105345  | 1 | 814  |
| POSITIVE REGULATION OF REACTIVE OXYGEN SPECIES METABOLIC PR     | POSITIVE REGULATION OF REA   | 75  | -0.43552506 | -1.652058  | 0.002617801 | 0.12109735  | 1 | 598  |
| REGULATION OF NITRIC OXIDE BIOSYNTHETIC PROCESS                 | REGULATION OF NITRIC OXIDE   | 48  | -0.47477174 | -1.6506666 | 0           | 0.121520564 | 1 | 198  |
| CLEAVAGE INVOLVED IN RRNA PROCESSING                            | CLEAVAGE INVOLVED IN RRNA    | 18  | -0.5905455  | -1.6486639 | 0.012765957 | 0.122551434 | 1 | 4716 |
| POSITIVE REGULATION OF CD4 POSITIVE ALPHA BETA T CELL ACTIVATIO | POSITIVE REGULATION OF CD4   | 23  | -0.5691609  | -1.645629  | 0.009433962 | 0.12467408  | 1 | 373  |
| BRANCHING INVOLVED IN SALIVARY GLAND MORPHOGENESIS              | BRANCHING INVOLVED IN SALIV  | 16  | -0.62353224 | -1.6439987 | 0.018367346 | 0.12552686  | 1 | 795  |
| REGULATION OF CD4 POSITIVE ALPHA BETA T CELL ACTIVATION         | REGULATION OF CD4 POSITIVE   | 30  | -0.52706844 | -1.643717  | 0.01369863  | 0.124831036 | 1 | 373  |
| RIBOSOMAL LARGE SUBUNIT ASSEMBLY                                | RIBOSOMAL LARGE SUBUNIT AS   | 21  | -0.5774823  | -1.6411891 | 0.024096385 | 0.12622117  | 1 | 4181 |
| NEGATIVE REGULATION OF LIPASE ACTIVITY                          | NEGATIVE REGULATION OF LIPA  | 15  | -0.63404745 | -1.6391689 | 0.008714597 | 0.12722947  | 1 | 1385 |
| REGULATION OF AMINE TRANSPORT                                   | REGULATION OF AMINE TRANS    | 70  | -0.43591616 | -1.6386166 | 0.005208334 | 0.12688187  | 1 | 1038 |
| REGULATION OF IMMUNOGLOBULIN SECRETION                          | REGULATION OF IMMUNOGLOB     | 16  | -0.62391645 | -1.636391  | 0.01793722  | 0.12847202  | 1 | 691  |
| SPLICEOSOMAL TRI SNRNP COMPLEX                                  | SPLICEOSOMAL TRI SNRNP CO    | 25  | -0.53115964 | -1.6363146 | 0.018867925 | 0.12764752  | 1 | 5771 |
| BINDING OF SPERM TO ZONA PELLUCIDA                              | BINDING OF SPERM TO ZONA P   | 23  | -0.5628001  | -1.6347451 | 0.010869565 | 0.12852176  | 1 | 3191 |
| SINGLE FERTILIZATION                                            | SINGLE FERTILIZATION         | 67  | -0.4402325  | -1.6337653 | 0.004854369 | 0.12873393  | 1 | 3191 |
| REGULATION OF RESPONSE TO FOOD                                  | REGULATION OF RESPONSE TO    | 18  | -0.58248925 | -1.6330615 | 0.025751073 | 0.12855853  | 1 | 310  |
| CELLULAR MODIFIED AMINO ACID BIOSYNTHETIC PROCESS               | CELLULAR MODIFIED AMINO AC   | 47  | -0.46783745 | -1.6313294 | 0.007246377 | 0.12936743  | 1 | 3247 |
| REGULATION OF MULTICELLULAR ORGANISMAL METABOLIC PROCESS        | REGULATION OF MULTICELLUL    | 34  | -0.5088341  | -1.6286978 | 0.016470589 | 0.13101038  | 1 | 299  |
| POSITIVE T CELL SELECTION                                       | POSITIVE T CELL SELECTION    | 16  | -0.60686964 | -1.6283677 | 0.027600849 | 0.13058516  | 1 | 2    |
| DNA TEMPLATED TRANSCRIPTION ELONGATION                          | DNA TEMPLATED TRANSCRIPTI    | 83  | -0.42352492 | -1.6268209 | 0           | 0.13147178  | 1 | 5690 |
| REGULATION OF TYPE 2 IMMUNE RESPONSE                            | REGULATION OF TYPE 2 IMMUN   | 22  | -0.57637864 | -1.6261991 | 0.013015185 | 0.13114494  | 1 | 1301 |
| AMMONIUM TRANSMEMBRANE TRANSPORTER ACTIVITY                     | AMMONIUM TRANSMEMBRANE       | 21  | -0.56804526 | -1.6256189 | 0.021598272 | 0.13086532  | 1 | 1620 |
| GROWTH FACTOR RECEPTOR BINDING                                  | GROWTH FACTOR RECEPTOR       | 112 | -0.39742866 | -1.625026  | 0.005747126 | 0.13072167  | 1 | 1069 |
| REGULATION OF POTASSIUM ION TRANSPORT                           | REGULATION OF POTASSIUM IC   | 79  | -0.4276063  | -1.6245054 | 0           | 0.13035122  | 1 | 2209 |
| HORMONE TRANSPORT                                               | HORMONE TRANSPORT            | 70  | -0.43659323 | -1.6206479 | 0           | 0.13350533  | 1 | 319  |
| NIK NF KAPPAB SIGNALING                                         | NIK NF KAPPAB SIGNALING      | 73  | -0.42508337 | -1.6174443 | 0.005263158 | 0.13604534  | 1 | 5893 |
| ACETYLCHOLINE BINDING                                           | ACETYLCHOLINE BINDING        | 19  | -0.59618646 | -1.6172688 | 0.022779044 | 0.13534378  | 1 | 3290 |
| BLOOD COAGULATION INTRINSIC PATHWAY                             | BLOOD COAGULATION INTRINS    | 16  | -0.6224568  | -1.6152682 | 0.020876827 | 0.13657106  | 1 | 363  |
| CORNIFIED ENVELOPE                                              | CORNIFIED ENVELOPE           | 17  | -0.58943444 | -1.6142095 | 0.019480519 | 0.13686062  | 1 | 2297 |
| FIBROBLAST GROWTH FACTOR RECEPTOR BINDING                       | FIBROBLAST GROWTH FACTOR     | 27  | -0.5294301  | -1.6138088 | 0.010845987 | 0.13639387  | 1 | 1286 |
| T CELL ACTIVATION INVOLVED IN IMMUNE RESPONSE                   | T CELL ACTIVATION INVOLVED I | 37  | -0.50091046 | -1.6131631 | 0           | 0.13616934  | 1 | 287  |
| MYELOID CELL HOMEOSTASIS                                        | MYELOID CELL HOMEOSTASIS     | 79  | -0.4252156  | -1.6124978 | 0.011049724 | 0.1360367   | 1 | 887  |
| NEGATIVE REGULATION OF SECRETION                                | NEGATIVE REGULATION OF SEC   | 172 | -0.3727858  | -1.6122775 | 0           | 0.13542643  | 1 | 1359 |
| RIBOSOMAL SMALL SUBUNIT BIOGENESIS                              | RIBOSOMAL SMALL SUBUNIT BI   | 53  | -0.4526313  | -1.610597  | 0.012106538 | 0.1363033   | 1 | 5920 |
| REGULATION OF BLOOD PRESSURE                                    | REGULATION OF BLOOD PRESS    | 145 | -0.38046545 | -1.6102413 | 0.002976191 | 0.13581362  | 1 | 900  |
| COFACTOR CATABOLIC PROCESS                                      | COFACTOR CATABOLIC PROCE     | 17  | -0.60583204 | -1.607994  | 0.016393442 | 0.13738987  | 1 | 397  |
| U2 SNRNP                                                        | U2 SNRNP                     | 17  | -0.59511024 | -1.6068072 | 0.025695931 | 0.13776828  | 1 | 3660 |
| ER NUCLEUS SIGNALING PATHWAY                                    | ER NUCLEUS SIGNALING PATHV   | 32  | -0.5070384  | -1.6048927 | 0.019002376 | 0.138942    | 1 | 2310 |
| REGULATION OF REACTIVE OXYGEN SPECIES BIOSYNTHETIC PROCESS      | REGULATION OF REACTIVE OXY   | 59  | -0.45101976 | -1.6048838 | 0.00255102  | 0.1381382   | 1 | 198  |
| POSITIVE REGULATION OF STAT CASCADE                             | POSITIVE REGULATION OF STAT  | 60  | -0.4406852  | -1.6045489 | 0.005037783 | 0.13772956  | 1 | 1359 |
| EXOSOME RNASE COMPLEX                                           | EXOSOME RNASE COMPLEX        | 18  | -0.57818687 | -1.6033396 | 0.033783782 | 0.13822304  | 1 | 3708 |
| NUCLEAR TRANSCRIBED MRNA CATABOLIC PROCESS EXONUCLEOLYT         | NUCLEAR TRANSCRIBED MRNA     | 27  | -0.52313024 | -1.603106  | 0.017699115 | 0.13764825  | 1 | 5285 |

|                                                           |                             |     |             |            |             |            |   |      |
|-----------------------------------------------------------|-----------------------------|-----|-------------|------------|-------------|------------|---|------|
| NCRNA CATABOLIC PROCESS                                   | NCRNA CATABOLIC PROCESS     | 17  | -0.593871   | -1.6019275 | 0.020576132 | 0.1380717  | 1 | 3708 |
| AMMONIUM ION BINDING                                      | AMMONIUM ION BINDING        | 60  | -0.43422395 | -1.5990611 | 0.007142857 | 0.14021803 | 1 | 1860 |
| POSITIVE REGULATION OF RESPONSE TO WOUNDING               | POSITIVE REGULATION OF RESI | 128 | -0.388692   | -1.5982804 | 0           | 0.14037856 | 1 | 413  |
| REGULATION OF SYSTEM PROCESS                              | REGULATION OF SYSTEM PROC   | 471 | -0.32834715 | -1.5977186 | 0           | 0.14027888 | 1 | 1401 |
| SPERM EGG RECOGNITION                                     | SPERM EGG RECOGNITION       | 25  | -0.53195333 | -1.5963802 | 0.027083334 | 0.14095286 | 1 | 5018 |
| RESPONSE TO CADMIUM ION                                   | RESPONSE TO CADMIUM ION     | 34  | -0.49306765 | -1.5960038 | 0.009708738 | 0.14052154 | 1 | 1654 |
| MOTILE CILIUM                                             | MOTILE CILIUM               | 71  | -0.41637227 | -1.5956029 | 0.007633588 | 0.14020576 | 1 | 3097 |
| RNA POLYMERASE ACTIVITY                                   | RNA POLYMERASE ACTIVITY     | 38  | -0.49662656 | -1.5951614 | 0.015189873 | 0.13996711 | 1 | 5690 |
| SNORNA BINDING                                            | SNORNA BINDING              | 26  | -0.53463733 | -1.594063  | 0.014799154 | 0.1404181  | 1 | 6050 |
| LOW DENSITY LIPOPROTEIN PARTICLE RECEPTOR BINDING         | LOW DENSITY LIPOPROTEIN PA  | 16  | -0.59347206 | -1.5927765 | 0.026258206 | 0.14101017 | 1 | 1860 |
| PROSTANOID BIOSYNTHETIC PROCESS                           | PROSTANOID BIOSYNTHETIC P   | 16  | -0.594672   | -1.5922258 | 0.03285421  | 0.14076108 | 1 | 1316 |
| REGULATION OF SYNAPTIC TRANSMISSION GLUTAMATERGIC         | REGULATION OF SYNAPTIC TRA  | 47  | -0.4545024  | -1.5918436 | 0.010050251 | 0.14042085 | 1 | 598  |
| OVARIAN FOLLICLE DEVELOPMENT                              | OVARIAN FOLLICLE DEVELOPME  | 51  | -0.45193514 | -1.5914117 | 0.014423077 | 0.14018342 | 1 | 1239 |
| RIBONUCLEASE ACTIVITY                                     | RIBONUCLEASE ACTIVITY       | 75  | -0.42091265 | -1.5893621 | 0.005361931 | 0.14168935 | 1 | 4930 |
| POSITIVE REGULATION OF LIGASE ACTIVITY                    | POSITIVE REGULATION OF LIGA | 101 | -0.39748314 | -1.5874932 | 0           | 0.14287776 | 1 | 5893 |
| POSITIVE REGULATION OF NEUROTRANSMITTER TRANSPORT         | POSITIVE REGULATION OF NEU  | 15  | -0.60377467 | -1.5867558 | 0.014314928 | 0.14304805 | 1 | 1359 |
| NEGATIVE REGULATION OF POTASSIUM ION TRANSPORT            | NEGATIVE REGULATION OF POT  | 29  | -0.52382517 | -1.5860679 | 0.034632035 | 0.14311473 | 1 | 1782 |
| CELLULAR RESPONSE TO FLUID SHEAR STRESS                   | CELLULAR RESPONSE TO FLUID  | 18  | -0.5846185  | -1.5859574 | 0.029227557 | 0.14245403 | 1 | 1639 |
| FEMALE GAMETE GENERATION                                  | FEMALE GAMETE GENERATION    | 66  | -0.42609072 | -1.5857458 | 0.010282776 | 0.1418895  | 1 | 2444 |
| TRIGLYCERIDE CATABOLIC PROCESS                            | TRIGLYCERIDE CATABOLIC PRO  | 21  | -0.56020814 | -1.5855138 | 0.024229076 | 0.14142999 | 1 | 1860 |
| REGULATION OF URINE VOLUME                                | REGULATION OF URINE VOLUM   | 20  | -0.5639464  | -1.5825925 | 0.020361992 | 0.14379206 | 1 | 1359 |
| REGULATION OF ENDOPLASMIC RETICULUM STRESS INDUCED INTRIN | REGULATION OF ENDOPLASMIC   | 26  | -0.5308047  | -1.5815501 | 0.02764977  | 0.14410391 | 1 | 1753 |
| OVULATION CYCLE PROCESS                                   | OVULATION CYCLE PROCESS     | 76  | -0.4114712  | -1.5788108 | 0.010526316 | 0.14632742 | 1 | 1239 |
| U12 TYPE SPLICEOSOMAL COMPLEX                             | U12 TYPE SPLICEOSOMAL COM   | 24  | -0.53203005 | -1.5753808 | 0.019955654 | 0.14938174 | 1 | 3660 |
| RESPONSE TO PAIN                                          | RESPONSE TO PAIN            | 26  | -0.52137536 | -1.5750811 | 0.025229357 | 0.14895347 | 1 | 1215 |
| STAT CASCADE                                              | STAT CASCADE                | 41  | -0.47006744 | -1.5745685 | 0.01724138  | 0.14872192 | 1 | 1225 |
| G PROTEIN COUPLED AMINE RECEPTOR ACTIVITY                 | G PROTEIN COUPLED AMINE RE  | 33  | -0.49774063 | -1.5713376 | 0.025943397 | 0.15160136 | 1 | 3570 |
| CARBOHYDRATE KINASE ACTIVITY                              | CARBOHYDRATE KINASE ACTIV   | 17  | -0.58471954 | -1.5704219 | 0.025806451 | 0.1517331  | 1 | 3635 |
| MITOCHONDRIAL RESPIRATORY CHAIN COMPLEX ASSEMBLY          | MITOCHONDRIAL RESPIRATOR    | 59  | -0.43436483 | -1.5685818 | 0.02189781  | 0.15316984 | 1 | 7283 |
| VASODILATION                                              | VASODILATION                | 25  | -0.52359414 | -1.5659082 | 0.018099548 | 0.15555234 | 1 | 236  |
| NEGATIVE REGULATION OF LIPID STORAGE                      | NEGATIVE REGULATION OF LIPI | 17  | -0.58307207 | -1.5657965 | 0.018907564 | 0.1549042  | 1 | 299  |
| CARBOHYDRATE PHOSPHORYLATION                              | CARBOHYDRATE PHOSPHORYL     | 18  | -0.5642845  | -1.5629354 | 0.031712472 | 0.15734911 | 1 | 4008 |
| POSITIVE REGULATION OF BEHAVIOR                           | POSITIVE REGULATION OF BEH/ | 20  | -0.55216634 | -1.5621771 | 0.03267974  | 0.15745832 | 1 | 1359 |
| POSITIVE REGULATION OF FATTY ACID BIOSYNTHETIC PROCESS    | POSITIVE REGULATION OF FATT | 17  | -0.57834524 | -1.5612104 | 0.03267974  | 0.15776668 | 1 | 2540 |
| POSITIVE REGULATION OF ACUTE INFLAMMATORY RESPONSE        | POSITIVE REGULATION OF ACU  | 25  | -0.5271728  | -1.5610977 | 0.031042129 | 0.15712583 | 1 | 413  |
| NEGATIVE REGULATION OF PEPTIDASE ACTIVITY                 | NEGATIVE REGULATION OF PEP  | 177 | -0.36526406 | -1.559287  | 0           | 0.15845431 | 1 | 1148 |
| PRERIBOSOME LARGE SUBUNIT PRECURSOR                       | PRERIBOSOME LARGE SUBUNIT   | 17  | -0.5781355  | -1.5587263 | 0.029535865 | 0.15838346 | 1 | 3389 |
| CYTOSOLIC RIBOSOME                                        | CYTOSOLIC RIBOSOME          | 101 | -0.3920506  | -1.5578437 | 0.007936508 | 0.15861148 | 1 | 7455 |
| DEFENSE RESPONSE TO BACTERIUM                             | DEFENSE RESPONSE TO BACTE   | 116 | -0.38081437 | -1.5575876 | 0.003003003 | 0.15820447 | 1 | 1673 |
| RRNA BINDING                                              | RRNA BINDING                | 53  | -0.43375117 | -1.5560036 | 0.016786572 | 0.15931103 | 1 | 5089 |
| NEUROMUSCULAR SYNAPTIC TRANSMISSION                       | NEUROMUSCULAR SYNAPTIC T    | 26  | -0.51192206 | -1.5529352 | 0.035955057 | 0.16224465 | 1 | 867  |
| NEUTRAL LIPID CATABOLIC PROCESS                           | NEUTRAL LIPID CATABOLIC PRO | 25  | -0.5175395  | -1.552355  | 0.034136545 | 0.16214025 | 1 | 1860 |
| REGULATION OF HORMONE SECRETION                           | REGULATION OF HORMONE SE    | 239 | -0.34401748 | -1.5522618 | 0           | 0.16145867 | 1 | 2412 |

|                                                                   |                             |     |             |            |             |            |   |      |
|-------------------------------------------------------------------|-----------------------------|-----|-------------|------------|-------------|------------|---|------|
| REGULATION OF PROTEIN IMPORT INTO NUCLEUS TRANSLOCATION           | REGULATION OF PROTEIN IMPC  | 19  | -0.5631081  | -1.5520402 | 0.047210302 | 0.1609801  | 1 | 541  |
| WATER TRANSPORT                                                   | WATER TRANSPORT             | 18  | -0.5436702  | -1.5511686 | 0.06511628  | 0.16127412 | 1 | 2153 |
| RNA PHOSPHODIESTER BOND HYDROLYSIS                                | RNA PHOSPHODIESTER BOND I   | 97  | -0.39572355 | -1.5497491 | 0.005540166 | 0.16221403 | 1 | 4930 |
| NEGATIVE REGULATION OF INTERFERON GAMMA PRODUCTION                | NEGATIVE REGULATION OF INT  | 24  | -0.51790345 | -1.5490801 | 0.027459955 | 0.1623412  | 1 | 2961 |
| RIBOSOMAL LARGE SUBUNIT BIOGENESIS                                | RIBOSOMAL LARGE SUBUNIT BI  | 44  | -0.4594868  | -1.5490752 | 0.013513514 | 0.16160087 | 1 | 5071 |
| PHASIC SMOOTH MUSCLE CONTRACTION                                  | PHASIC SMOOTH MUSCLE CON    | 15  | -0.5848662  | -1.5470359 | 0.044444446 | 0.1632779  | 1 | 716  |
| ANAPHASE PROMOTING COMPLEX DEPENDENT CATABOLIC PROCESS            | ANAPHASE PROMOTING COMPI    | 73  | -0.40845042 | -1.5441308 | 0.00530504  | 0.16619964 | 1 | 7670 |
| PROTEIN HOMOTETRAMERIZATION                                       | PROTEIN HOMOTETRAMERIZAT    | 55  | -0.4339742  | -1.5435418 | 0.015306123 | 0.16611451 | 1 | 4241 |
| POSITIVE REGULATION OF FATTY ACID METABOLIC PROCESS               | POSITIVE REGULATION OF FATT | 33  | -0.47876945 | -1.5426396 | 0.01978022  | 0.16635132 | 1 | 2107 |
| RESPONSE TO HEAT                                                  | RESPONSE TO HEAT            | 77  | -0.4095533  | -1.5418661 | 0.016853932 | 0.16659059 | 1 | 1590 |
| CYTOKINE RECEPTOR BINDING                                         | CYTOKINE RECEPTOR BINDING   | 202 | -0.34807688 | -1.5379907 | 0           | 0.17050132 | 1 | 1088 |
| SPLICEOSOMAL SNRNP ASSEMBLY                                       | SPLICEOSOMAL SNRNP ASSEMB   | 34  | -0.4754643  | -1.5379537 | 0.021413276 | 0.16977246 | 1 | 4322 |
| TETRAPYRROLE METABOLIC PROCESS                                    | TETRAPYRROLE METABOLIC PR   | 53  | -0.44046834 | -1.5346752 | 0.016548464 | 0.17310183 | 1 | 3591 |
| NUCLEASE ACTIVITY                                                 | NUCLEASE ACTIVITY           | 157 | -0.3662824  | -1.5335778 | 0.003030303 | 0.17373148 | 1 | 4957 |
| POSITIVE REGULATION OF INTERLEUKIN 6 PRODUCTION                   | POSITIVE REGULATION OF INTE | 56  | -0.43621257 | -1.5320773 | 0.014457831 | 0.17493683 | 1 | 319  |
| INNER MITOCHONDRIAL MEMBRANE PROTEIN COMPLEX                      | INNER MITOCHONDRIAL MEMB    | 93  | -0.38588896 | -1.5320398 | 0.010526316 | 0.17421031 | 1 | 7329 |
| HEME BIOSYNTHETIC PROCESS                                         | HEME BIOSYNTHETIC PROCESS   | 20  | -0.54336375 | -1.5315003 | 0.033264033 | 0.17422497 | 1 | 5772 |
| U5 SNRNP                                                          | U5 SNRNP                    | 16  | -0.57524556 | -1.5302283 | 0.046025105 | 0.17492884 | 1 | 3660 |
| ACTIVATION OF ADENYLATE CYCLASE ACTIVITY                          | ACTIVATION OF ADENYLATE CY  | 36  | -0.4672132  | -1.5300931 | 0.029612755 | 0.1743691  | 1 | 2369 |
| RESPONSE TO TUMOR NECROSIS FACTOR                                 | RESPONSE TO TUMOR NECROS    | 182 | -0.34968266 | -1.527638  | 0.003257329 | 0.17670485 | 1 | 1341 |
| UNSATURATED FATTY ACID METABOLIC PROCESS                          | UNSATURATED FATTY ACID ME   | 71  | -0.40398467 | -1.5274428 | 0.010471204 | 0.17615965 | 1 | 316  |
| MITOCHONDRIAL RESPIRATORY CHAIN COMPLEX I BIOGENESIS              | MITOCHONDRIAL RESPIRATOR    | 48  | -0.44593737 | -1.526048  | 0.029339854 | 0.17707443 | 1 | 7283 |
| REGULATION OF APPETITE                                            | REGULATION OF APPETITE      | 22  | -0.5292496  | -1.5251846 | 0.046413504 | 0.17741995 | 1 | 310  |
| SIGNAL RELEASE                                                    | SIGNAL RELEASE              | 154 | -0.36110792 | -1.5248322 | 0           | 0.17714715 | 1 | 1753 |
| POSITIVE REGULATION OF ERK1 AND ERK2 CASCADE                      | POSITIVE REGULATION OF ERK  | 133 | -0.366752   | -1.522887  | 0.006116208 | 0.17876211 | 1 | 887  |
| TETRAPYRROLE BIOSYNTHETIC PROCESS                                 | TETRAPYRROLE BIOSYNTHETIC   | 26  | -0.5052387  | -1.5222982 | 0.029478459 | 0.17886777 | 1 | 3430 |
| CALCIUM ION REGULATED EXOCYTOSIS OF NEUROTRANSMITTER              | CALCIUM ION REGULATED EXO   | 28  | -0.49877366 | -1.5220474 | 0.03524229  | 0.17845209 | 1 | 2246 |
| PROTEASOME COMPLEX                                                | PROTEASOME COMPLEX          | 70  | -0.40572596 | -1.5220261 | 0.017676767 | 0.17774692 | 1 | 7481 |
| RESPONSE TO ANTIBIOTIC                                            | RESPONSE TO ANTIBIOTIC      | 43  | -0.4493413  | -1.5186414 | 0.009367681 | 0.18140796 | 1 | 316  |
| ESTROUS CYCLE                                                     | ESTROUS CYCLE               | 18  | -0.5489115  | -1.5183762 | 0.050955415 | 0.18103981 | 1 | 1081 |
| CELL REDOX HOMEOSTASIS                                            | CELL REDOX HOMEOSTASIS      | 54  | -0.42965674 | -1.5171634 | 0.02173913  | 0.18186167 | 1 | 352  |
| PEPTIDE TRANSPORT                                                 | PEPTIDE TRANSPORT           | 66  | -0.4128453  | -1.5167581 | 0.012285012 | 0.18158329 | 1 | 1753 |
| MITOCHONDRIAL PROTEIN COMPLEX                                     | MITOCHONDRIAL PROTEIN CON   | 119 | -0.37327826 | -1.5149662 | 0.00617284  | 0.18314807 | 1 | 7369 |
| CELLULAR RESPONSE TO ALCOHOL                                      | CELLULAR RESPONSE TO ALCO   | 105 | -0.38075763 | -1.5142857 | 0.008333334 | 0.1834359  | 1 | 1128 |
| TRANSFERASE ACTIVITY TRANSFERRING AMINO ACYL GROUPS               | TRANSFERASE ACTIVITY TRANS  | 15  | -0.5744686  | -1.5133828 | 0.04        | 0.18381685 | 1 | 884  |
| REGULATION OF DIGESTIVE SYSTEM PROCESS                            | REGULATION OF DIGESTIVE SY  | 33  | -0.47896248 | -1.513037  | 0.029411765 | 0.18351287 | 1 | 2667 |
| RESPONSE TO MOLECULE OF BACTERIAL ORIGIN                          | RESPONSE TO MOLECULE OF B   | 280 | -0.32937184 | -1.5129856 | 0           | 0.18283932 | 1 | 1153 |
| OXYGEN BINDING                                                    | OXYGEN BINDING              | 24  | -0.5129608  | -1.5128042 | 0.030042918 | 0.18238054 | 1 | 2184 |
| SENSORY PERCEPTION OF PAIN                                        | SENSORY PERCEPTION OF PAIN  | 69  | -0.4025032  | -1.5122916 | 0.026666667 | 0.1823285  | 1 | 1505 |
| ADENYLATE CYCLASE ACTIVATING G PROTEIN COUPLED RECEPTOR SIGNALING | ADENYLATE CYCLASE ACTIVATI  | 54  | -0.43051577 | -1.5121413 | 0.020512821 | 0.1817751  | 1 | 900  |
| REGULATION OF KERATINOCYTE PROLIFERATION                          | REGULATION OF KERATINOCYT   | 23  | -0.508729   | -1.5119845 | 0.030567685 | 0.18129219 | 1 | 1664 |
| RESPONSE TO HYDROGEN PEROXIDE                                     | RESPONSE TO HYDROGEN PER    | 100 | -0.37693194 | -1.5110351 | 0.005617978 | 0.18181239 | 1 | 216  |
| MATERNAL PROCESS INVOLVED IN FEMALE PREGNANCY                     | MATERNAL PROCESS INVOLVEI   | 53  | -0.42667273 | -1.5107136 | 0.017632242 | 0.18148367 | 1 | 983  |

|                                                                       |                                                                       |     |             |            |             |            |   |      |
|-----------------------------------------------------------------------|-----------------------------------------------------------------------|-----|-------------|------------|-------------|------------|---|------|
| PSEUDOURIDINE SYNTHESIS                                               | PSEUDOURIDINE SYNTHESIS                                               | 15  | -0.581652   | -1.5093158 | 0.042372882 | 0.18249226 | 1 | 2986 |
| NEGATIVE REGULATION OF NEURON DEATH                                   | NEGATIVE REGULATION OF NEURON DEATH                                   | 152 | -0.3553655  | -1.5091907 | 0           | 0.1819384  | 1 | 2000 |
| INTRINSIC APOPTOTIC SIGNALING PATHWAY                                 | INTRINSIC APOPTOTIC SIGNALING PATHWAY                                 | 134 | -0.364631   | -1.508536  | 0.005780347 | 0.18210009 | 1 | 1597 |
| RNA PHOSPHODIESTER BOND HYDROLYSIS ENDONUCLEOLYTIC                    | RNA PHOSPHODIESTER BOND HYDROLYSIS ENDONUCLEOLYTIC                    | 52  | -0.42352653 | -1.5078399 | 0.024271844 | 0.18224119 | 1 | 4909 |
| REGULATION OF AMINO ACID TRANSPORT                                    | REGULATION OF AMINO ACID TRANSPORT                                    | 25  | -0.4915542  | -1.5073988 | 0.05463183  | 0.18216921 | 1 | 917  |
| REGULATION OF CATECHOLAMINE SECRETION                                 | REGULATION OF CATECHOLAMINE SECRETION                                 | 42  | -0.4397539  | -1.5073323 | 0.025171624 | 0.18156698 | 1 | 1315 |
| HISTONE MRNA METABOLIC PROCESS                                        | HISTONE MRNA METABOLIC PROCESS                                        | 25  | -0.5023693  | -1.5062847 | 0.0247191   | 0.1821372  | 1 | 5633 |
| REGULATION OF INFLAMMATORY RESPONSE                                   | REGULATION OF INFLAMMATORY RESPONSE                                   | 240 | -0.33373713 | -1.5062556 | 0.003533569 | 0.18148285 | 1 | 1359 |
| PROTEIN TARGETING TO MITOCHONDRION                                    | PROTEIN TARGETING TO MITOCHONDRION                                    | 44  | -0.43842366 | -1.5050302 | 0.025906736 | 0.18225285 | 1 | 6509 |
| INTRINSIC COMPONENT OF MITOCHONDRIAL INNER MEMBRANE                   | INTRINSIC COMPONENT OF MITOCHONDRIAL INNER MEMBRANE                   | 16  | -0.5573384  | -1.5046825 | 0.06508876  | 0.18203111 | 1 | 4339 |
| CELLULAR RESPONSE TO KETONE                                           | CELLULAR RESPONSE TO KETONE                                           | 69  | -0.4005081  | -1.5040661 | 0.012953368 | 0.18211387 | 1 | 459  |
| LIGASE ACTIVITY FORMING CARBON NITROGEN BONDS                         | LIGASE ACTIVITY FORMING CARBON NITROGEN BONDS                         | 45  | -0.4421545  | -1.5025651 | 0.023316063 | 0.18338753 | 1 | 3552 |
| REGULATION OF VASOCONSTRICTION                                        | REGULATION OF VASOCONSTRICTION                                        | 61  | -0.41895628 | -1.5004456 | 0.025773196 | 0.18529692 | 1 | 2883 |
| CLATHRIN BINDING                                                      | CLATHRIN BINDING                                                      | 52  | -0.42702314 | -1.5000782 | 0.029339854 | 0.18510163 | 1 | 1247 |
| POSITIVE REGULATION OF HORMONE SECRETION                              | POSITIVE REGULATION OF HORMONE SECRETION                              | 107 | -0.37145925 | -1.498013  | 0.008902078 | 0.18706751 | 1 | 2412 |
| OXIDOREDUCTASE ACTIVITY ACTING ON NAD P H QUINONE OR SIMILAR          | OXIDOREDUCTASE ACTIVITY ACTING ON NAD P H QUINONE OR SIMILAR          | 46  | -0.4393343  | -1.4960595 | 0.042128604 | 0.18885854 | 1 | 7283 |
| NCRNA 3 END PROCESSING                                                | NCRNA 3 END PROCESSING                                                | 18  | -0.5428576  | -1.4953035 | 0.054545455 | 0.1891     | 1 | 5579 |
| POSITIVE REGULATION OF ANION TRANSPORT                                | POSITIVE REGULATION OF ANION TRANSPORT                                | 53  | -0.41383368 | -1.4939908 | 0.02238806  | 0.1901258  | 1 | 413  |
| NEGATIVE REGULATION OF CYSTEINE TYPE ENDOPEPTIDASE ACTIVITY           | NEGATIVE REGULATION OF CYSTEINE TYPE ENDOPEPTIDASE ACTIVITY           | 76  | -0.392046   | -1.4939059 | 0.010752688 | 0.18951656 | 1 | 1310 |
| THREONINE TYPE PEPTIDASE ACTIVITY                                     | THREONINE TYPE PEPTIDASE ACTIVITY                                     | 18  | -0.5419048  | -1.492682  | 0.057815846 | 0.19043736 | 1 | 5887 |
| REGULATION OF MACROPHAGE DIFFERENTIATION                              | REGULATION OF MACROPHAGE DIFFERENTIATION                              | 19  | -0.5425801  | -1.4913406 | 0.051282052 | 0.1915715  | 1 | 621  |
| LYMPHOCYTE ACTIVATION INVOLVED IN IMMUNE RESPONSE                     | LYMPHOCYTE ACTIVATION INVOLVED IN IMMUNE RESPONSE                     | 70  | -0.40071315 | -1.4903527 | 0.013227513 | 0.1921314  | 1 | 1359 |
| OVULATION                                                             | OVULATION                                                             | 16  | -0.5681397  | -1.4900314 | 0.06431536  | 0.19183323 | 1 | 908  |
| SALIVARY GLAND DEVELOPMENT                                            | SALIVARY GLAND DEVELOPMENT                                            | 31  | -0.4819838  | -1.4893404 | 0.03803132  | 0.19208884 | 1 | 937  |
| GAMMA TUBULIN COMPLEX                                                 | GAMMA TUBULIN COMPLEX                                                 | 15  | -0.57429147 | -1.4893016 | 0.043392505 | 0.19148552 | 1 | 4428 |
| CIRCULATORY SYSTEM PROCESS                                            | CIRCULATORY SYSTEM PROCESS                                            | 326 | -0.32090357 | -1.4887723 | 0           | 0.19147106 | 1 | 2338 |
| RESPONSE TO INTERLEUKIN 4                                             | RESPONSE TO INTERLEUKIN 4                                             | 28  | -0.48238257 | -1.4878048 | 0.049676027 | 0.1919718  | 1 | 465  |
| REGULATION OF REACTIVE OXYGEN SPECIES METABOLIC PROCESS               | REGULATION OF REACTIVE OXYGEN SPECIES METABOLIC PROCESS               | 132 | -0.35306308 | -1.4878005 | 0.016666668 | 0.19130246 | 1 | 1658 |
| PALMITOYLTRANSFERASE ACTIVITY                                         | PALMITOYLTRANSFERASE ACTIVITY                                         | 28  | -0.48619598 | -1.487645  | 0.041942604 | 0.1908322  | 1 | 2869 |
| SNARE BINDING                                                         | SNARE BINDING                                                         | 110 | -0.36425754 | -1.4865952 | 0.018766755 | 0.19155277 | 1 | 2389 |
| RESPONSE TO ATP                                                       | RESPONSE TO ATP                                                       | 29  | -0.47075677 | -1.486306  | 0.039337475 | 0.19125162 | 1 | 716  |
| U4 U6 X U5 TRI SNRNP COMPLEX                                          | U4 U6 X U5 TRI SNRNP COMPLEX                                          | 20  | -0.5397503  | -1.485856  | 0.059196617 | 0.19129172 | 1 | 5633 |
| SYMPATHETIC NERVOUS SYSTEM DEVELOPMENT                                | SYMPATHETIC NERVOUS SYSTEM DEVELOPMENT                                | 18  | -0.55113745 | -1.4858037 | 0.06198347  | 0.19068505 | 1 | 4342 |
| LEUKOCYTE HOMEOSTASIS                                                 | LEUKOCYTE HOMEOSTASIS                                                 | 52  | -0.4181489  | -1.4855887 | 0.030075189 | 0.19029953 | 1 | 2552 |
| ALDITOL METABOLIC PROCESS                                             | ALDITOL METABOLIC PROCESS                                             | 16  | -0.5502645  | -1.4855599 | 0.05788423  | 0.18970095 | 1 | 2980 |
| OVULATION CYCLE                                                       | OVULATION CYCLE                                                       | 99  | -0.37328175 | -1.4852479 | 0.0078125   | 0.18949583 | 1 | 1239 |
| STRUCTURAL CONSTITUENT OF RIBOSOME                                    | STRUCTURAL CONSTITUENT OF RIBOSOME                                    | 192 | -0.34091878 | -1.4844387 | 0           | 0.18993105 | 1 | 7457 |
| REGULATION OF TRANSFORMING GROWTH FACTOR BETA PRODUCTION              | REGULATION OF TRANSFORMING GROWTH FACTOR BETA PRODUCTION              | 21  | -0.52256995 | -1.482731  | 0.04112554  | 0.19133961 | 1 | 4265 |
| TRANSCRIPTION FACTOR TFIIID COMPLEX                                   | TRANSCRIPTION FACTOR TFIIID COMPLEX                                   | 19  | -0.53149444 | -1.4818634 | 0.047817048 | 0.19184008 | 1 | 3023 |
| POSITIVE REGULATION OF IMMUNE EFFECTOR PROCESS                        | POSITIVE REGULATION OF IMMUNE EFFECTOR PROCESS                        | 130 | -0.3567113  | -1.4795928 | 0.002976191 | 0.19405459 | 1 | 771  |
| ENDOCRINE PROCESS                                                     | ENDOCRINE PROCESS                                                     | 38  | -0.44895583 | -1.4793258 | 0.049411766 | 0.19377719 | 1 | 2174 |
| REGULATION OF SYSTEMIC ARTERIAL BLOOD PRESSURE BY HORMONAL MECHANISMS | REGULATION OF SYSTEMIC ARTERIAL BLOOD PRESSURE BY HORMONAL MECHANISMS | 30  | -0.4736552  | -1.47694   | 0.048034936 | 0.1962737  | 1 | 2174 |
| DECIDUALIZATION                                                       | DECIDUALIZATION                                                       | 20  | -0.5194038  | -1.4752    | 0.07594936  | 0.1978949  | 1 | 621  |

|                                                                              |                             |     |             |            |             |            |   |      |
|------------------------------------------------------------------------------|-----------------------------|-----|-------------|------------|-------------|------------|---|------|
| CARBOHYDRATE TRANSPORT                                                       | CARBOHYDRATE TRANSPORT      | 80  | -0.37704593 | -1.4748414 | 0.018324608 | 0.1976951  | 1 | 2681 |
| NEUTRAL LIPID METABOLIC PROCESS                                              | NEUTRAL LIPID METABOLIC PRO | 76  | -0.38658246 | -1.4742677 | 0.015957447 | 0.19774294 | 1 | 2010 |
| POSITIVE REGULATION OF SMOOTH MUSCLE CELL PROLIFERATION                      | POSITIVE REGULATION OF SMO  | 56  | -0.41435722 | -1.4736433 | 0.035885166 | 0.19787605 | 1 | 7    |
| AMIDE TRANSPORT                                                              | AMIDE TRANSPORT             | 86  | -0.37916154 | -1.4723507 | 0.026954178 | 0.19893293 | 1 | 1753 |
| POSITIVE REGULATION OF PRODUCTION OF MOLECULAR MEDIATOR OF IMMUNE RESPONSE   | POSITIVE REGULATION OF PRO  | 55  | -0.4116909  | -1.4718888 | 0.021791767 | 0.1988569  | 1 | 1444 |
| POSITIVE REGULATION OF SYNAPTIC TRANSMISSION                                 | POSITIVE REGULATION OF SYN  | 101 | -0.36916587 | -1.4706763 | 0.008474576 | 0.19986254 | 1 | 1578 |
| REGULATION OF SYSTEMIC ARTERIAL BLOOD PRESSURE MEDIATED BY NEURAL MECHANISMS | REGULATION OF SYSTEMIC AR   | 40  | -0.44337496 | -1.4702408 | 0.0647482   | 0.1998278  | 1 | 5670 |
| ENDONUCLEASE ACTIVITY                                                        | ENDONUCLEASE ACTIVITY       | 95  | -0.37676018 | -1.4698186 | 0.012658228 | 0.19981    | 1 | 4756 |
| REGULATION OF CIRCADIAN RHYTHM                                               | REGULATION OF CIRCADIAN RH  | 92  | -0.37869564 | -1.4671913 | 0.015625    | 0.20259586 | 1 | 1407 |
| TETRAPYRROLE BINDING                                                         | TETRAPYRROLE BINDING        | 84  | -0.3793695  | -1.4671406 | 0.015228426 | 0.20200098 | 1 | 883  |
| CYTOSOLIC PART                                                               | CYTOSOLIC PART              | 186 | -0.33493024 | -1.4666361 | 0           | 0.201992   | 1 | 7481 |
| DNA DIRECTED RNA POLYMERASE III COMPLEX                                      | DNA DIRECTED RNA POLYMER    | 16  | -0.5478966  | -1.4656448 | 0.05567452  | 0.20272966 | 1 | 5690 |
| RESPONSE TO TEMPERATURE STIMULUS                                             | RESPONSE TO TEMPERATURE     | 128 | -0.35419306 | -1.4652139 | 0.016574586 | 0.20258796 | 1 | 1590 |
| NEGATIVE REGULATION OF CARBOHYDRATE METABOLIC PROCESS                        | NEGATIVE REGULATION OF CAR  | 41  | -0.4416111  | -1.464601  | 0.03456221  | 0.20272787 | 1 | 1315 |
| MULTICELLULAR ORGANISMAL RESPONSE TO STRESS                                  | MULTICELLULAR ORGANISMAL    | 64  | -0.39967018 | -1.4625052 | 0.024509804 | 0.20488754 | 1 | 1215 |
| INFLAMMATORY RESPONSE                                                        | INFLAMMATORY RESPONSE       | 339 | -0.30894756 | -1.462265  | 0           | 0.20454146 | 1 | 1084 |
| REGULATION OF NEUROTRANSMITTER TRANSPORT                                     | REGULATION OF NEUROTRANS    | 58  | -0.39720213 | -1.461888  | 0.02        | 0.2044358  | 1 | 2332 |
| PROTEASOME ACCESSORY COMPLEX                                                 | PROTEASOME ACCESSORY CO     | 23  | -0.49786693 | -1.4602864 | 0.06696428  | 0.20589502 | 1 | 7613 |
| ENDORIBONUCLEASE COMPLEX                                                     | ENDORIBONUCLEASE COMPLE     | 17  | -0.5443269  | -1.4595349 | 0.057395145 | 0.2062938  | 1 | 3691 |
| BLOOD COAGULATION FIBRIN CLOT FORMATION                                      | BLOOD COAGULATION FIBRIN C  | 22  | -0.5074394  | -1.4568717 | 0.057522126 | 0.20938872 | 1 | 363  |
| REGULATION OF CYTOKINE BIOSYNTHETIC PROCESS                                  | REGULATION OF CYTOKINE BIO  | 77  | -0.38490415 | -1.4566895 | 0.029333333 | 0.209007   | 1 | 215  |
| REGULATION OF PRODUCTION OF MOLECULAR MEDIATOR OF IMMUNE RESPONSE            | REGULATION OF PRODUCTION    | 85  | -0.3711027  | -1.4553424 | 0.009925558 | 0.2101326  | 1 | 1444 |
| CYTOPLASMIC TRANSLATION                                                      | CYTOPLASMIC TRANSLATION     | 38  | -0.4432526  | -1.4531518 | 0.03837472  | 0.21257405 | 1 | 6994 |
| RRNA MODIFICATION                                                            | RRNA MODIFICATION           | 22  | -0.507285   | -1.4518151 | 0.06521739  | 0.21370053 | 1 | 3881 |
| REGULATION OF ADENYLATE CYCLASE ACTIVITY                                     | REGULATION OF ADENYLATE C   | 64  | -0.3960506  | -1.45106   | 0.029023746 | 0.21404397 | 1 | 1467 |
| INTERMEDIATE FILAMENT ORGANIZATION                                           | INTERMEDIATE FILAMENT ORG   | 19  | -0.52850926 | -1.4508499 | 0.05882353  | 0.2136798  | 1 | 715  |
| SNAP RECEPTOR ACTIVITY                                                       | SNAP RECEPTOR ACTIVITY      | 33  | -0.45146918 | -1.4497415 | 0.046838406 | 0.2145873  | 1 | 3297 |
| CELLULAR RESPONSE TO HYDROGEN PEROXIDE                                       | CELLULAR RESPONSE TO HYDR   | 55  | -0.41078296 | -1.4493854 | 0.04379562  | 0.2145949  | 1 | 216  |
| RESPONSE TO BACTERIUM                                                        | RESPONSE TO BACTERIUM       | 370 | -0.30817643 | -1.4477462 | 0           | 0.21622553 | 1 | 1153 |
| EXOCRINE SYSTEM DEVELOPMENT                                                  | EXOCRINE SYSTEM DEVELOPM    | 43  | -0.41932932 | -1.4467467 | 0.040302265 | 0.2168338  | 1 | 937  |
| RESPONSE TO PROTOZOAN                                                        | RESPONSE TO PROTOZOAN       | 18  | -0.5235125  | -1.446707  | 0.07392197  | 0.21622217 | 1 | 140  |
| AMINO ACID BETAINE METABOLIC PROCESS                                         | AMINO ACID BETAINE METABOL  | 18  | -0.54725134 | -1.4463378 | 0.07949791  | 0.21608591 | 1 | 3055 |
| MYELOID LEUKOCYTE MIGRATION                                                  | MYELOID LEUKOCYTE MIGRATI   | 73  | -0.38488442 | -1.4457092 | 0.02917772  | 0.21628095 | 1 | 1194 |
| RESPONSE TO EXTRACELLULAR STIMULUS                                           | RESPONSE TO EXTRACELLULAR   | 410 | -0.30303368 | -1.442221  | 0           | 0.22055115 | 1 | 1712 |
| REGULATION OF NECROTIC CELL DEATH                                            | REGULATION OF NECROTIC CE   | 23  | -0.49624252 | -1.4419107 | 0.07522124  | 0.22035748 | 1 | 1468 |
| REGULATION OF ENDOCRINE PROCESS                                              | REGULATION OF ENDOCRINE P   | 44  | -0.42229626 | -1.4413791 | 0.02739726  | 0.22047465 | 1 | 1038 |
| POSITIVE REGULATION OF SECRETION                                             | POSITIVE REGULATION OF SEC  | 316 | -0.310219   | -1.441378  | 0           | 0.21982126 | 1 | 2412 |
| RNA CAPPING                                                                  | RNA CAPPING                 | 34  | -0.44613087 | -1.4404988 | 0.058252428 | 0.22034411 | 1 | 5723 |
| REGULATION OF LYASE ACTIVITY                                                 | REGULATION OF LYASE ACTIVIT | 78  | -0.3792947  | -1.4400505 | 0.031088082 | 0.22040416 | 1 | 922  |
| MULTI MULTICELLULAR ORGANISM PROCESS                                         | MULTI MULTICELLULAR ORGAN   | 178 | -0.3349211  | -1.4370419 | 0.006230529 | 0.22397721 | 1 | 1639 |
| NEGATIVE REGULATION OF CYTOKINE SECRETION                                    | NEGATIVE REGULATION OF CYT  | 31  | -0.45390552 | -1.4363214 | 0.058441557 | 0.22433162 | 1 | 1359 |
| CELLULAR RESPONSE TO GLUCOSE STARVATION                                      | CELLULAR RESPONSE TO GLUC   | 30  | -0.45526192 | -1.4361544 | 0.05491991  | 0.22391376 | 1 | 3972 |
| OXIDOREDUCTASE ACTIVITY ACTING ON PEROXIDE AS ACCEPTOR                       | OXIDOREDUCTASE ACTIVITY AC  | 35  | -0.4403891  | -1.43615   | 0.049763035 | 0.2232646  | 1 | 40   |



|                                                                          |                             |     |             |            |             |            |   |      |
|--------------------------------------------------------------------------|-----------------------------|-----|-------------|------------|-------------|------------|---|------|
| POSITIVE REGULATION OF NF KAPPAB TRANSCRIPTION FACTOR ACTIVATION         | POSITIVE REGULATION OF NF K | 112 | -0.354142   | -1.435459  | 0.016       | 0.22362961 | 1 | 1468 |
| POSITIVE REGULATION OF ALPHA BETA T CELL DIFFERENTIATION                 | POSITIVE REGULATION OF ALPH | 31  | -0.45109162 | -1.4343241 | 0.058956917 | 0.22453584 | 1 | 2    |
| NEGATIVE REGULATION OF PROTEOLYSIS                                       | NEGATIVE REGULATION OF PRO  | 253 | -0.3157989  | -1.4331231 | 0           | 0.22563861 | 1 | 1310 |
| REGULATION OF ALPHA BETA T CELL DIFFERENTIATION                          | REGULATION OF ALPHA BETA T  | 37  | -0.43442369 | -1.4322191 | 0.057208236 | 0.22635579 | 1 | 2    |
| POSITIVE REGULATION OF PEPTIDE SECRETION                                 | POSITIVE REGULATION OF PEPT | 82  | -0.36715126 | -1.4312605 | 0.021447722 | 0.22703332 | 1 | 2412 |
| REGULATION OF DOPAMINE SECRETION                                         | REGULATION OF DOPAMINE SE   | 22  | -0.49248195 | -1.430936  | 0.06048387  | 0.22885581 | 1 | 867  |
| OXIDOREDUCTASE ACTIVITY ACTING ON PAIRED DONORS WITH INCOMPLETE REDOX    | OXIDOREDUCTASE ACTIVITY AC  | 26  | -0.47041622 | -1.4301897 | 0.06593407  | 0.22718418 | 1 | 1206 |
| MULTI ORGANISM METABOLIC PROCESS                                         | MULTI ORGANISM METABOLIC P  | 128 | -0.34645948 | -1.4299927 | 0.009345794 | 0.22683115 | 1 | 7455 |
| CELLULAR METABOLIC COMPOUND SALVAGE                                      | CELLULAR METABOLIC COMPO    | 31  | -0.46260047 | -1.4293532 | 0.06418219  | 0.22725613 | 1 | 6576 |
| DIGESTION                                                                | DIGESTION                   | 100 | -0.35716358 | -1.4273509 | 0.021917809 | 0.22956927 | 1 | 1486 |
| NUCLEOBASE BIOSYNTHETIC PROCESS                                          | NUCLEOBASE BIOSYNTHETIC P   | 17  | -0.5214006  | -1.424214  | 0.07805907  | 0.23370193 | 1 | 3055 |
| REGULATION OF LIGASE ACTIVITY                                            | REGULATION OF LIGASE ACTIVI | 119 | -0.3451833  | -1.4221232 | 0.012618297 | 0.23615907 | 1 | 5893 |
| NEGATIVE REGULATION OF CALCIUM ION TRANSPORT                             | NEGATIVE REGULATION OF CAL  | 44  | -0.421213   | -1.421     | 0.035799522 | 0.23723716 | 1 | 400  |
| INTERMEDIATE FILAMENT BASED PROCESS                                      | INTERMEDIATE FILAMENT BASE  | 37  | -0.42383933 | -1.4203533 | 0.049881235 | 0.2375629  | 1 | 2001 |
| NEGATIVE REGULATION OF BLOOD PRESSURE                                    | NEGATIVE REGULATION OF BLO  | 41  | -0.41764176 | -1.4201684 | 0.055309735 | 0.23712546 | 1 | 3922 |
| REGULATION OF RESPONSE TO WOUNDING                                       | REGULATION OF RESPONSE TO   | 344 | -0.30643508 | -1.4168161 | 0           | 0.24156949 | 1 | 1311 |
| ENDORIBONUCLEASE ACTIVITY PRODUCING 5 PHOSPHOMONOESTERS                  | ENDORIBONUCLEASE ACTIVITY   | 25  | -0.47995478 | -1.4150153 | 0.0787037   | 0.24379633 | 1 | 4909 |
| RESPONSE TO TRANSITION METAL NANOPARTICLE                                | RESPONSE TO TRANSITION ME   | 130 | -0.33859673 | -1.4145788 | 0.009118541 | 0.2437639  | 1 | 1277 |
| NUCLEIC ACID PHOSPHODIESTER BOND HYDROLYSIS                              | NUCLEIC ACID PHOSPHODIEST   | 208 | -0.32388794 | -1.4141859 | 0           | 0.24365608 | 1 | 5057 |
| EXCRETION                                                                | EXCRETION                   | 42  | -0.41379026 | -1.4121912 | 0.0520362   | 0.24602704 | 1 | 1706 |
| POSITIVE REGULATION OF DNA REPLICATION                                   | POSITIVE REGULATION OF DNA  | 78  | -0.3629849  | -1.4110427 | 0.025252525 | 0.24713914 | 1 | 229  |
| FOLIC ACID METABOLIC PROCESS                                             | FOLIC ACID METABOLIC PROCE  | 17  | -0.51644874 | -1.4109027 | 0.08898305  | 0.24661696 | 1 | 5705 |
| GLYCOSYL COMPOUND CATABOLIC PROCESS                                      | GLYCOSYL COMPOUND CATABO    | 31  | -0.45353988 | -1.4098713 | 0.073068894 | 0.24746238 | 1 | 3179 |
| LEUKOCYTE CHEMOTAXIS                                                     | LEUKOCYTE CHEMOTAXIS        | 91  | -0.35307142 | -1.4085457 | 0.02406417  | 0.24878691 | 1 | 1201 |
| PIGMENT METABOLIC PROCESS                                                | PIGMENT METABOLIC PROCESS   | 52  | -0.4023851  | -1.4080186 | 0.06367925  | 0.24888144 | 1 | 3591 |
| PROTEIN LOCALIZATION TO MITOCHONDRION                                    | PROTEIN LOCALIZATION TO MIT | 59  | -0.38216123 | -1.4079753 | 0.035545025 | 0.2482795  | 1 | 7082 |
| METAL CLUSTER BINDING                                                    | METAL CLUSTER BINDING       | 55  | -0.39306262 | -1.4076259 | 0.066831686 | 0.2480896  | 1 | 7443 |
| POSITIVE REGULATION OF CHEMOKINE PRODUCTION                              | POSITIVE REGULATION OF CHE  | 40  | -0.42287114 | -1.4073389 | 0.061926607 | 0.2478202  | 1 | 319  |
| POSITIVE REGULATION OF INSULIN SECRETION INVOLVED IN CELLULAR METABOLISM | POSITIVE REGULATION OF INSU | 23  | -0.488199   | -1.4059256 | 0.09684685  | 0.24928598 | 1 | 4886 |

| Down Regulated in APC <sup>+/Pirc</sup> +/OX in relation to wild-type |                  |             |      |            |           |           |           |            |             |
|-----------------------------------------------------------------------|------------------|-------------|------|------------|-----------|-----------|-----------|------------|-------------|
| NAME                                                                  | GS<br> follow li | GS DETAILS  | SIZE | ES         | NES       | NOM p-val | FDR q-val | FWER p-val | RANK AT MAX |
| EXTRACELLULAR MATRIX COMPONENT                                        | EXTRACELLUL      | Details ... | 111  | 0.6992233  | 2.5978312 | 0         | 0         | 0          | 2354        |
| ENSHEATHMENT OF NEURONS                                               | ENSHEATHME       | Details ... | 83   | 0.6816524  | 2.414752  | 0         | 0         | 0          | 1680        |
| PROTEINACEOUS EXTRACELLULAR MATRIX                                    | PROTEINACEO      | Details ... | 292  | 0.5758632  | 2.3865523 | 0         | 0         | 0          | 1716        |
| EXTRACELLULAR MATRIX BINDING                                          | EXTRACELLUL      | Details ... | 41   | 0.739514   | 2.3541222 | 0         | 0         | 0          | 1697        |
| EXTRACELLULAR MATRIX                                                  | EXTRACELLUL      | Details ... | 351  | 0.55319816 | 2.3176136 | 0         | 0         | 0          | 2452        |
| COLLAGEN BINDING                                                      | COLLAGEN BIN     | Details ... | 50   | 0.708326   | 2.3174088 | 0         | 0         | 0          | 1620        |
| REGULATION OF CARTILAGE DEVELOPMENT                                   | REGULATION O     | Details ... | 51   | 0.70255125 | 2.3109586 | 0         | 0         | 0          | 2601        |
| COLLAGEN TRIMER                                                       | COLLAGEN TR      | Details ... | 67   | 0.66677797 | 2.3083568 | 0         | 0         | 0          | 1679        |
| REGULATION OF CHONDROCYTE DIFFERENTIATION                             | REGULATION O     | Details ... | 37   | 0.76406735 | 2.3068252 | 0         | 0         | 0          | 2601        |
| BASEMENT MEMBRANE                                                     | BASEMENT ME      | Details ... | 81   | 0.6520201  | 2.280848  | 0         | 0         | 0          | 2354        |
| COMPLEX OF COLLAGEN TRIMERS                                           | COMPLEX OF C     | Details ... | 22   | 0.83910173 | 2.278998  | 0         | 0         | 0          | 1679        |

|                                                                            |                                                                            |             |     |            |           |             |             |       |      |
|----------------------------------------------------------------------------|----------------------------------------------------------------------------|-------------|-----|------------|-----------|-------------|-------------|-------|------|
| BONE DEVELOPMENT                                                           | BONE DEVELOPMENT                                                           | Details ... | 141 | 0.5865296  | 2.270413  | 0           | 0           | 0     | 2185 |
| CELL MATRIX ADHESION                                                       | CELL MATRIX ADHESION                                                       | Details ... | 103 | 0.61496246 | 2.2502763 | 0           | 0           | 0     | 2437 |
| EXTRACELLULAR STRUCTURE ORGANIZATION                                       | EXTRACELLULAR STRUCTURE ORGANIZATION                                       | Details ... | 260 | 0.5402207  | 2.222778  | 0           | 1.49E-04    | 0.002 | 2473 |
| CELL SUBSTRATE ADHESION                                                    | CELL SUBSTRATE ADHESION                                                    | Details ... | 144 | 0.5697678  | 2.1820848 | 0           | 3.47E-04    | 0.005 | 2437 |
| CHONDROCYTE DIFFERENTIATION                                                | CHONDROCYTE DIFFERENTIATION                                                | Details ... | 53  | 0.66284615 | 2.1816912 | 0           | 3.25E-04    | 0.005 | 2139 |
| NEGATIVE REGULATION OF TRANSFORMING GROWTH FACTOR BETA PATHWAY             | NEGATIVE REGULATION OF TRANSFORMING GROWTH FACTOR BETA PATHWAY             | Details ... | 59  | 0.6378764  | 2.155715  | 0           | 4.90E-04    | 0.008 | 1105 |
| SCHWANN CELL DIFFERENTIATION                                               | SCHWANN CELL DIFFERENTIATION                                               | Details ... | 30  | 0.73784286 | 2.151092  | 0           | 5.81E-04    | 0.01  | 2575 |
| CANONICAL WNT SIGNALING PATHWAY                                            | CANONICAL WNT SIGNALING PATHWAY                                            | Details ... | 75  | 0.6160004  | 2.1480687 | 0           | 6.04E-04    | 0.011 | 1589 |
| SKELETAL SYSTEM DEVELOPMENT                                                | SKELETAL SYSTEM DEVELOPMENT                                                | Details ... | 396 | 0.49951655 | 2.126146  | 0           | 0.001146836 | 0.021 | 2185 |
| ENDOCHONDRAL BONE MORPHOGENESIS                                            | ENDOCHONDRAL BONE MORPHOGENESIS                                            | Details ... | 41  | 0.6743561  | 2.1220813 | 0           | 0.001192407 | 0.023 | 2161 |
| BONE MORPHOGENESIS                                                         | BONE MORPHOGENESIS                                                         | Details ... | 69  | 0.61362857 | 2.1189167 | 0           | 0.001327559 | 0.027 | 2161 |
| CONNECTIVE TISSUE DEVELOPMENT                                              | CONNECTIVE TISSUE DEVELOPMENT                                              | Details ... | 166 | 0.5346225  | 2.1020133 | 0           | 0.001723111 | 0.036 | 2185 |
| CARTILAGE DEVELOPMENT                                                      | CARTILAGE DEVELOPMENT                                                      | Details ... | 128 | 0.55716497 | 2.1002471 | 0           | 0.001651315 | 0.036 | 2185 |
| POSITIVE REGULATION OF STEM CELL DIFFERENTIATION                           | POSITIVE REGULATION OF STEM CELL DIFFERENTIATION                           | Details ... | 43  | 0.65838027 | 2.0897753 | 0           | 0.001878162 | 0.043 | 1063 |
| REGULATION OF STEM CELL DIFFERENTIATION                                    | REGULATION OF STEM CELL DIFFERENTIATION                                    | Details ... | 95  | 0.5726009  | 2.0874763 | 0           | 0.001886995 | 0.045 | 1221 |
| REGULATION OF CELLULAR RESPONSE TO TRANSFORMING GROWTH FACTOR BETA PATHWAY | REGULATION OF CELLULAR RESPONSE TO TRANSFORMING GROWTH FACTOR BETA PATHWAY | Details ... | 87  | 0.5764726  | 2.0872536 | 0           | 0.001817106 | 0.045 | 1105 |
| SKELETAL SYSTEM MORPHOGENESIS                                              | SKELETAL SYSTEM MORPHOGENESIS                                              | Details ... | 166 | 0.5279275  | 2.0839016 | 0           | 0.001939769 | 0.05  | 2161 |
| PERIPHERAL NERVOUS SYSTEM AXON ENSHEATHMENT                                | PERIPHERAL NERVOUS SYSTEM AXON ENSHEATHMENT                                | Details ... | 21  | 0.7728995  | 2.0830863 | 0           | 0.001979958 | 0.053 | 1182 |
| COLLAGEN FIBRIL ORGANIZATION                                               | COLLAGEN FIBRIL ORGANIZATION                                               | Details ... | 34  | 0.6993348  | 2.0652502 | 0           | 0.002575385 | 0.071 | 2608 |
| MEMBRANE PROTEIN PROTEOLYSIS                                               | MEMBRANE PROTEIN PROTEOLYSIS                                               | Details ... | 33  | 0.69261014 | 2.0591502 | 0           | 0.002794588 | 0.078 | 1947 |
| SCHWANN CELL DEVELOPMENT                                                   | SCHWANN CELL DEVELOPMENT                                                   | Details ... | 25  | 0.73166883 | 2.0539007 | 0           | 0.003031134 | 0.087 | 1867 |
| REGULATION OF CELLULAR RESPONSE TO GROWTH FACTOR STIMULUS                  | REGULATION OF CELLULAR RESPONSE TO GROWTH FACTOR STIMULUS                  | Details ... | 197 | 0.5097253  | 2.051497  | 0           | 0.003001672 | 0.089 | 1206 |
| SMAD BINDING                                                               | SMAD BINDING                                                               | Details ... | 62  | 0.6049491  | 2.0484452 | 0           | 0.002975029 | 0.09  | 2476 |
| BETA CATENIN BINDING                                                       | BETA CATENIN BINDING                                                       | Details ... | 73  | 0.5839476  | 2.0358965 | 0           | 0.003485941 | 0.109 | 1734 |
| EXTRACELLULAR MATRIX STRUCTURAL CONSTITUENT                                | EXTRACELLULAR MATRIX STRUCTURAL CONSTITUENT                                | Details ... | 63  | 0.59945196 | 2.0261571 | 0           | 0.003822845 | 0.123 | 1679 |
| APPENDAGE DEVELOPMENT                                                      | APPENDAGE DEVELOPMENT                                                      | Details ... | 133 | 0.5279114  | 2.0248644 | 0           | 0.003775477 | 0.125 | 2802 |
| REGULATION OF SMALL GTPASE MEDIATED SIGNAL TRANSDUCTION                    | REGULATION OF SMALL GTPASE MEDIATED SIGNAL TRANSDUCTION                    | Details ... | 248 | 0.49366313 | 2.024741  | 0           | 0.003676122 | 0.125 | 2584 |
| GLIAL CELL DIFFERENTIATION                                                 | GLIAL CELL DIFFERENTIATION                                                 | Details ... | 123 | 0.535029   | 2.015629  | 0           | 0.004114042 | 0.138 | 1989 |
| REGULATION OF LAMELLIPODIUM ORGANIZATION                                   | REGULATION OF LAMELLIPODIUM ORGANIZATION                                   | Details ... | 32  | 0.68065745 | 2.0149183 | 0           | 0.004011191 | 0.138 | 2160 |
| EMBRYONIC EYE MORPHOGENESIS                                                | EMBRYONIC EYE MORPHOGENESIS                                                | Details ... | 31  | 0.677109   | 2.01426   | 0.001795332 | 0.003913357 | 0.138 | 1025 |
| ENDODERM DEVELOPMENT                                                       | ENDODERM DEVELOPMENT                                                       | Details ... | 60  | 0.5972082  | 2.0071712 | 0           | 0.004468182 | 0.159 | 1366 |
| REGULATION OF EPITHELIAL TO MESENCHYMAL TRANSITION                         | REGULATION OF EPITHELIAL TO MESENCHYMAL TRANSITION                         | Details ... | 58  | 0.6034728  | 2.0067313 | 0           | 0.004364271 | 0.159 | 1221 |
| SENSORY ORGAN MORPHOGENESIS                                                | SENSORY ORGAN MORPHOGENESIS                                                | Details ... | 206 | 0.49415582 | 2.0053625 | 0           | 0.004525335 | 0.17  | 2409 |
| LAMELLIPODIUM MEMBRANE                                                     | LAMELLIPODIUM MEMBRANE                                                     | Details ... | 19  | 0.7451145  | 2.0038557 | 0           | 0.004563333 | 0.175 | 1858 |
| NEGATIVE REGULATION OF CELL JUNCTION ASSEMBLY                              | NEGATIVE REGULATION OF CELL JUNCTION ASSEMBLY                              | Details ... | 18  | 0.76398754 | 2.0000577 | 0           | 0.004893971 | 0.193 | 2160 |
| MUSCLE ORGAN DEVELOPMENT                                                   | MUSCLE ORGAN DEVELOPMENT                                                   | Details ... | 230 | 0.49222553 | 1.9988596 | 0           | 0.0049667   | 0.201 | 1537 |
| EAR DEVELOPMENT                                                            | EAR DEVELOPMENT                                                            | Details ... | 159 | 0.5118388  | 1.9982015 | 0           | 0.004905887 | 0.202 | 2049 |
| TRABECULA FORMATION                                                        | TRABECULA FORMATION                                                        | Details ... | 20  | 0.7541097  | 1.9968579 | 0           | 0.004869513 | 0.205 | 1946 |
| POSITIVE REGULATION OF CARTILAGE DEVELOPMENT                               | POSITIVE REGULATION OF CARTILAGE DEVELOPMENT                               | Details ... | 21  | 0.7382876  | 1.9934283 | 0           | 0.005042414 | 0.216 | 2846 |
| NEGATIVE REGULATION OF CELLULAR RESPONSE TO GROWTH FACTOR                  | NEGATIVE REGULATION OF CELLULAR RESPONSE TO GROWTH FACTOR                  | Details ... | 104 | 0.53408754 | 1.9905947 | 0           | 0.005230209 | 0.226 | 1206 |
